# 1 **Functional wetland loss drives emerging risks to waterbird migration networks**

2

3 J. Patrick Donnelly<sup>1\*</sup>, Johnnie N. Moore<sup>2</sup>, Michael L. Casazza<sup>3</sup>, Shea P. Coons<sup>4</sup>

4

5 <sup>1</sup> Intermountain West Joint Venture - United States Fish and Wildlife Service, Migratory Bird  
6 Program, Missoula, MT, United States, <sup>2</sup> Group For Quantitative Study of Snow and Ice,

7 Department of Geosciences, University of Montana, Missoula, MT, United States, <sup>3</sup> United  
8 States Geological Survey, Western Ecological Research Center, Dixon, CA, United States

9 <sup>4</sup> Avian Science Center - University of Montana, Missoula, MT, United States.

10

11 \*Correspondence: J. Patrick Donnelly, [patrick\\_donnelly@fws.gov](mailto:patrick_donnelly@fws.gov)

12

13 Keywords: agriculture, flyway, migration, shorebirds, water, waterbirds, waterfowl, wetlands,  
14 wildlife refuge

15

16 Abstract

17 Migratory waterbirds (i.e., shorebirds, wading birds, and waterfowl) are particularly vulnerable  
18 to climate and land-use change. Life history strategies supported by an interdependent network  
19 of diffuse geographic regions can expose waterbird populations to multiple independent risks  
20 throughout their range. Emerging bottlenecks raise concerns over sustainability of continental  
21 wetland networks as water scarcity triggers ecological effects misaligned with waterbird habitat  
22 needs. Here we use important wetland regions in Oregon and California, USA, as a model  
23 system to examine impacts of these changes on waterbird migration networks in western North  
24 America. We monitored wetland hydrology and flooded agricultural habitats monthly from 1988  
25 to 2020 using satellite imagery to quantify the timing and duration of inundation - a key delimiter  
26 of habitat niche values associated with waterbird use. Trends were binned by management  
27 practice and wetland hydroperiods (semi-permanent, seasonal, and temporary) to identify  
28 differences in their climate and land-use change sensitivity. Wetland results were assessed using  
29 33 waterbird species to detect nonlinear effects of network change across a diversity of life cycle  
30 and habitat needs. Pervasive loss of semi-permanent wetlands was an indicator of systemic  
31 functional decline driven by cascading top-down effects of shifting ecosystem water balance.  
32 Shortened hydroperiods caused by excessive drying transitioned semi-permanent wetlands to  
33 seasonal and temporary hydrologies—a process that in part counterbalanced concurrent seasonal  
34 and temporary wetland losses. Expansion of seasonal and temporary wetlands associated with  
35 closed basin lakes offset wetland declines on other public and private lands, including wildlife  
36 refuges. Diving ducks, black terns, and grebes exhibited the most significant risk of habitat  
37 decline due to semi-permanent wetland loss that overlapped important migration, breeding,  
38 molting, and wintering periods. Shorebirds and dabbling ducks were beneficiaries of stable  
39 agricultural practices and top-down processes of functional wetland declines that operated  
40 collectively to maintain habitat needs. Outcomes from this work provide a novel perspective of

41 wetland ecosystem change affecting waterbirds and their migration networks. Understanding the  
42 complexity of these relationships will become increasingly important as water scarcity continues  
43 to restructure the timing and availability of wetland resources.

44

## 45 1.0 Introduction

46 Conservation of migratory birds is complex, requiring knowledge of species movements between  
47 distinct geographic regions spanning hundreds to thousands of kilometers that collectively  
48 support breeding, wintering, and stopover habitats. Climate and land-use change have  
49 substantially increased the risk of species declines globally (Spooner *et al.* 2018). Migratory  
50 birds are particularly vulnerable to these changes because of life-history strategies supported by  
51 an interdependent network of diffuse geographic regions that can expose populations to multiple  
52 risks across their range (Zurell *et al.* 2018). Risks are compounded by cross-seasonal effects  
53 where environmental conditions experienced in one location (breeding grounds, wintering  
54 grounds, or stopover areas) can affect the fitness in subsequent locations leading to declines in  
55 long-term demographic performance. While some birds have changed their migration  
56 chronology and range extent to align with shifting climate and land-use patterns (Hitch and  
57 Leberg 2007; Visser *et al.* 2009), increasing environmental pressures are likely to outstrip the  
58 adaptive plasticity of many species (Schmaljohann and Both 2017).

59 In arid and semi-arid mid-latitudes, migratory shorebirds, waterfowl, and wading birds,  
60 hereafter ‘*waterbirds*’, rely on a limited number of important wetland areas to connect  
61 continental movements supporting annual life-cycle events. Today, water development  
62 associated with many of these sites acts as drivers of irrigated agriculture and urban development  
63 supporting metropolitan centers and agricultural economies that account for 40% of global food  
64 production (UNESCO-UN-Water 2020). Although growth has significantly altered most wetland  
65 and riparian ecosystems, these systems remain fundamental to biological processes sustaining  
66 migratory waterbirds. Waterbirds in some regions have adapted to landscape change by utilizing  
67 agricultural food resources and flood irrigation practices to offset historic wetland losses.  
68 (Elphick and Oring 2003; Taft and Haig 2005; Donnelly *et al.* 2021). Emerging impacts of  
69 climate change in these regions raise concerns over the sustainability of continental wetland  
70 networks as water scarcity triggers land-use change and ecological effects misaligned with  
71 waterbird habitat needs (Haig *et al.* 2019; Donnelly *et al.* 2020).

72 Because aridity limits wetland networks, individual sites must account for multiple  
73 ecosystem demands to support differences in species life-cycle chronology and habitat needs.  
74 Non-linear effects of climate and land-use change can create bias in waterbird impacts resulting  
75 from patterns of wetland decline or land-use that disproportionately affect one species over  
76 another (Amano *et al.* 2020). Waterfowl in North America, for example, have benefited from  
77 proactive wetland conservation across their northern prairie breeding grounds in Canada and the  
78 United States. Although population trends of many species have increased, northern pintails  
79 (*Anas acuta*) have declined due to unforeseen impacts of shifting agricultural practices  
80 misaligned with behavioral traits of nesting hens (Podrutzny *et al.* 2002; Duncan and Devries

81 2018). Understanding the complexity of similar tradeoffs will become crucial as escalating water  
82 scarcity restructures the timing and availability of wetland habitats throughout migratory  
83 networks (Kirby *et al.* 2008). Minimizing these risks will require a novel approach to wetland  
84 conservation that considers network interdependence and multi-species landscape reliance.

85 Wetlands in Southern Oregon and Northeast California (including the extreme northeast  
86 portion of Nevada), hereafter *SONEC*, and the Central Valley of California, USA, represent two  
87 of the most important landscapes in North America's waterbird migration networks (Figure 1).  
88 These regions function as interdependent landscapes in the Pacific Flyway, providing wintering,  
89 breeding, and stopover habitats that link waterbird migration from the Arctic to Central-South  
90 America (Shuford *et al.* 1998; Baldassarre 2014). Collectively, the regions support habitat for  
91 over 60% of waterfowl in the western half of the continent (Petrie *et al.* 2013; USFWS 2020) in  
92 addition to providing essential breeding, wintering, and stopover habitats for a variety of  
93 shorebird and wading bird species (American Bird Conservancy 2015). Both regions contain  
94 sites designated as internationally important to shorebird migration that support up to 500,000  
95 individuals annually (Shuford *et al.* 1998; Senner *et al.* 2016). Most waterbird species move  
96 through *SONEC* in the fall on their way to wintering grounds in the Central Valley. Most birds  
97 have departed the Central Valley by spring and utilize *SONEC* as an important stopover site  
98 before moving north for breeding (Fleskes and Yee 2007).

99

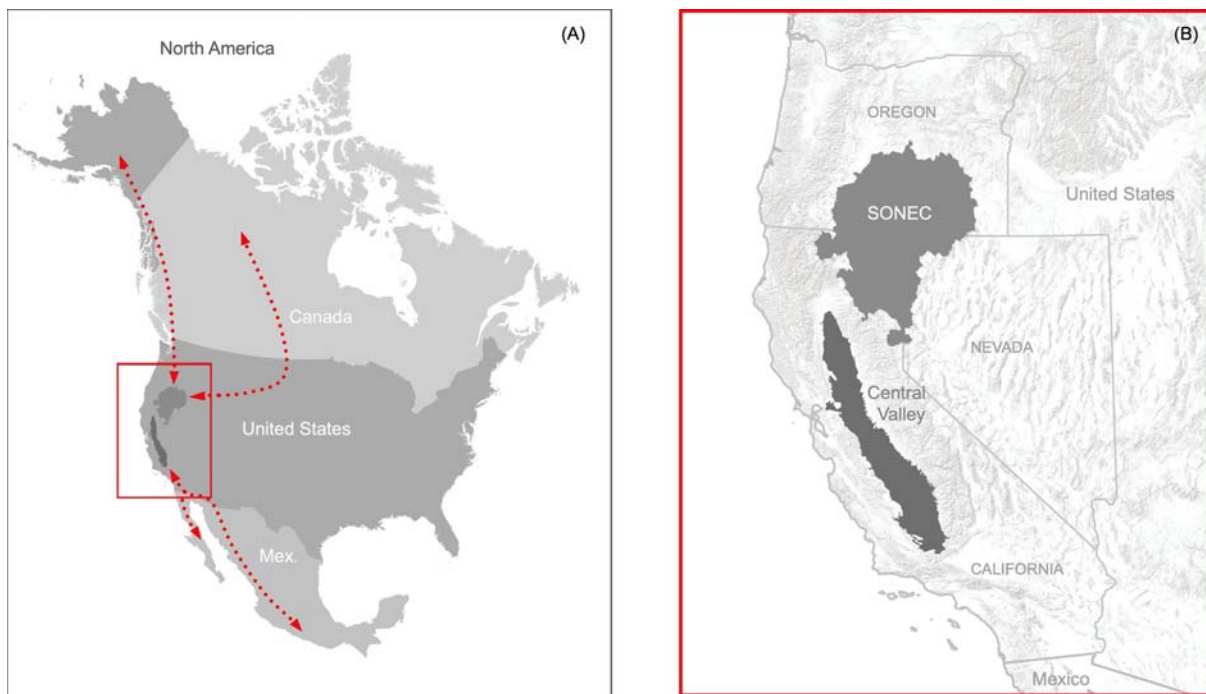

100  
101 Figure 1. The study area includes critical landscapes connecting waterbird migration networks in  
102 western North America (A) represented by *SONEC* (Southern Oregon and Northeast California)  
103 and the Central Valley in the states of California, Oregon, and Nevada, USA (B).

104

105 To evaluate the effects of wetland change, we used SONEC and the Central Valley as a  
106 model system to identify emerging bottlenecks to waterbird migration in western North America.  
107 This approach provides a unique framework for assessing network risks caused by a diversity of  
108 ecological and anthropogenic drivers supporting wetland functions distinct to each region.  
109 Wetland monitoring was conducted monthly from 1988 to 2020 using satellite imagery to  
110 reconstruct changing surface water hydrology. A similar approach was applied to measure  
111 surface water trends associated with flooded agriculture supporting important waterbird habitats  
112 (e.g., rice and grass hay cultivation). Wetland results were classified annually by hydroperiod to  
113 depict the timing and duration of flooding— a key delimiter of habitat niche values associated  
114 with waterbird use (Foti *et al.* 2012). Wetland and agricultural trends were assessed regionally  
115 using 33 waterbird species representing a diversity of life cycles and habitat dependence. Results  
116 provide a novel perspective of wetland ecosystems and waterbirds that identify clear tradeoffs in  
117 potential species impacts stemming from multiple independent risks to migratory networks.  
118 Although we implemented our approach using waterbird migration networks in western North  
119 America, the framework is applicable to all eight global waterbird flyways (Wetlands  
120 International 2012), all of which are impacted by climate and land-use change (Amano *et al.*  
121 2020).

122

## 123 2. Material and Methods

124

### 125 2.1 Study sites

126 Study sites included the SONEC and Central Valley regions in California, Nevada, and Oregon,  
127 USA (Figure 1). The SONEC region includes 11.4 million ha of the Northern Great Basin and  
128 portions of the Eastern Cascades ecoregions (Wiken *et al.* 2011). This area acts as a significant  
129 waterbird migration stopover site in the Pacific Flyway (Smith *et al.* 1989) and provides essential  
130 breeding habitat for many species, including; white-faced ibis (*Plegadis chihi*), redheads (*Aythya*  
131 *americana*), and American avocet (*Recurvirostra americana*). Large semi-permanent wetlands  
132 also support late summer molting habitat essential to sustaining regional cinnamon teal (*Spatula*  
133 *cyanoptera*), gadwall (*Mareca strepera*), and mallard (*Anas platyrhynchos*) populations (sensu  
134 Yarris *et al.* 1994). Wetland freezing minimizes most waterbird use during December and  
135 January wintering periods.

136 The SONEC landscape is characterized by closed basins supporting palustrine emergent  
137 wetlands and littoral-lacustrine systems associated with large terminal freshwater and saline  
138 lakes. The region is rural, with an overall human population of less than 350,000 (U.S. Census  
139 Bureau 2021). Low-intensity farming of flood-irrigated grass hay meadows function as important  
140 agricultural resources on private lands that make up a majority of spring waterbird habitat  
141 (Donnelly *et al.* 2019). Other agricultural habitats include minor areas of cereal grain (e.g.,  
142 wheat) that are flooded post-harvest in early spring and late fall. Public wetlands are  
143 concentrated on several large wildlife refuges managed to benefit breeding and migrating  
144 waterbirds. Climate is characterized by cold, wet winters and hot, dry summers. Wetland

145 flooding is induced by spring runoff tied to high-elevation snowmelt. Most wetlands are flooded  
146 seasonally in late winter through early summer, after which evaporative drying reduces surface  
147 water availability. The region's minimal reservoir storage capacity limits agriculture producers'  
148 and public refuge managers' ability to augment wetland water needs during drought.

149 The Central Valley includes 4.6 million ha of valley bottom as defined by the Central  
150 California Valley ecoregion (Wiken *et al.* 2011). The valley functions as one of the largest  
151 waterbird wintering areas in the Pacific Flyway. It is also recognized as a significant stopover  
152 location, connecting migrants to wintering sites in the Gulf of California, western Mexico, and  
153 Central and South America. The region provides breeding habitat for many species, including  
154 blacked-necked stilts (*Himantopus mexicanus*), American avocets, cinnamon teal, gadwall, and  
155 mallard. Climate is characterized by temperate wet winters and hot, dry summers. Wetland  
156 conversion to industrialized agriculture beginning in the early 1900s has transformed the Central  
157 Valley into one of the most productive agricultural regions in the world, supporting 25% of U.S.  
158 food production valued at \$17 billion annually (USGS 2020). Crop production is made possible  
159 through irrigation sustained by large water reclamation projects that have resulted in damming  
160 and diking of most river systems for water storage, conveyance, and flood control. Over 17  
161 million people reside in the region, with the majority concentrated in metropolitan and urban  
162 areas embedded within the agricultural landscape (U.S. Census Bureau 2021).

163 Rice cultivation makes up a majority of agricultural habitat in the Central Valley and has  
164 become crucial to sustaining wintering waterbirds (November to February) through post-harvest  
165 field flooding that decomposes leftover rice stubble (Petrie *et al.* 2016). Flood irrigation of rice  
166 during the growing season (May to August) can also provide important habitat for some  
167 waterbird species ((USFWS 2020)). Flooding practices associated with other crops (e.g., corn,  
168 wheat, and safflower) make up a relatively small component of available agricultural habitats  
169 (Fleskes *et al.* 2003). A culture of waterfowl hunting has also resulted in the substantial  
170 development of privately-owned wetlands (hereafter *duck clubs*). Most of these sites are restored  
171 agricultural lands managed for fall-winter waterfowl hunting that otherwise provide beneficial  
172 wetland habitat for waterbirds (USFWS 2020). Publicly owned wetlands are distributed across a  
173 complex of wildlife refuges managed primarily to support large concentrations of wintering  
174 waterfowl. Nearly all wetland hydrology is controlled through irrigation water conveyance and  
175 must be actively manipulated to alter the timing and duration of flooding. Exhaustive policy  
176 dictating water use combined with growing competition between agriculture, urban, and  
177 environmental demands also influences wetland hydrology and flooded agriculture patterns.  
178 High reservoir storage capacity capturing snow-melt runoff from the Sierra Nevada (mountains)  
179 allows the region to attenuate drought except during extreme conditions when water delivery  
180 supporting wetland and agricultural resources is curtailed.

181  
182 **2.2 Surface water trends**  
183 Wetland hydrology and agricultural flooding were monitored using Landsat 5 Thematic Mapper  
184 and Landsat 8 Operational Land Imager satellite imagery to depict the timing and duration of

185 wetland surface water. Following an approach outlined by Donnelly et al. (2021), surface water  
186 conditions were measured monthly (January to December) from 1988 to 2020 as a five-year  
187 running mean beginning in 1984. Normalizing estimates in this way moderated annual climate  
188 variability influencing hydrologic conditions (Rajagopalan and Lall 1998) and improved  
189 detectability of long-term trends. Satellite data were formatted by binning individual Landsat  
190 scenes by month and averaging results into twelve composite images for each five-year mean.  
191 Results provided 444 unique monthly measures of wetland surface water for the SONEC and  
192 Central Valley regions. The accuracy of surface water area was estimated to be 93-98% by  
193 comparison to previous work and similar methods used by Donnelly et al. (2019) that overlapped  
194 over half of our study site. The accuracy was comparable to similar time-series wetland  
195 inundation studies using Landsat data (Jin et al., 2017).

196 Monthly monitoring allowed wetlands to be separated into hydrologic regimes (hereafter  
197 ‘hydroperiods’) by totaling the monthly presence of surface water within years. Wetland totals  
198 were classified as ‘temporary’ (flooded  $\leq 2$  months), ‘seasonal’ (flooded  $> 2$  and  $\leq 8$  months), or  
199 ‘semi-permanent’ (flooded  $> 8$  months) using standards similar to Cowardin et al. (1979).  
200 Temporary, seasonal, and semi-permanent classes included littoral-lacustrine wetland systems  
201 associated with large closed-basin lakes found in SONEC (Cowardin *et al.* 1979). Wetland  
202 conditions were captured using a 30x30 meter pixel grid to account for hydrologic diversity  
203 within individual wetlands. Classification of hydroperiods provided context for wetland function  
204 important to structuring unique food resources and vegetation communities linked to waterbird  
205 foraging guilds. Flooded agriculture was omitted from the hydroperiod classification. Still, it was  
206 considered similar to seasonal and temporary wetlands for the purpose of evaluating waterbird  
207 habitat trends due to irrigation and other cultivation practices that mimicked habitat requisite of  
208 these wetland types. A description of remote sensing procedures used for wetland monitoring is  
209 provided as supplemental material (*see* Supplemental Materials - Methods, Section 1).

210 Wetland hydroperiod results were categorized into functional groups (Table 1) using GIS  
211 to link public-private ownership and specific ecologic and land-use characteristics to monthly  
212 surface water patterns. For example, we differentiated between natural wetlands and those  
213 actively managed through irrigation infrastructure and surface water manipulation (hereafter  
214 *managed wetlands*). To define unique functional groups, ownership was then used to subset  
215 managed wetlands by public wildlife refuges and private duck clubs. Functional group  
216 delineations were developed and stored as a polygon layer through on-screen digitizing and  
217 photo interpretation of high resolution ( $\leq 1$  m) multispectral satellite imagery acquired after  
218 2018. The National Agricultural Statistics Service Cropland Data Layer was used as an ancillary  
219 input to aid classification (NASS 2019). Surface water associated with large reservoirs, mining,  
220 and recreation (e.g., golf courses) was excluded due to their limited value to migratory  
221 waterbirds. Ownership was assigned using the Bureau of Land Management’s surface land  
222 ownership data ([sagemap.wr.usgs.gov](https://sagemap.wr.usgs.gov)). Flooded agriculture occurred primarily on private lands  
223 and included minor areas on public wildlife refuges used as lure crops for wintering waterfowl.

224

225 Table 1 Wetland-agriculture functional groups.

| Group               | Description                                                                                                                                                         |
|---------------------|---------------------------------------------------------------------------------------------------------------------------------------------------------------------|
| Closed-basin lakes  | Large terminal water bodies associated with littoral-lacustrine wetland systems in SONEC closed basins.                                                             |
| Flooded agriculture | Agricultural flooding associated with grass hay, rice, or other crop types—areas related to flood irrigation or flooding occurring post-harvest or before planting. |
| Duck clubs          | Privately managed wetlands in the Central Valley maintained specifically for waterfowl hunting and wildlife— i.e., planned manipulation of surface water hydrology. |
| Private wetlands    | Private un-managed or natural wetlands.                                                                                                                             |
| Wildlife refuges    | Public wildlife refuges maintained specifically for wildlife through active wetland management.                                                                     |
| Public wetlands     | Un-managed or natural wetlands in SONEC occurring on public lands (e.g., National Forest).                                                                          |

226  
227 Changes to wetland hydrology in SONEC and the Central Valley were quantified by  
228 splitting monitoring results into equal periods, P1 (1988-2004) and P2 (2005-20), and measuring  
229 monthly differences using nonparametric Wilcoxon rank-order tests (Siegel 1957). By  
230 comparing trends over long periods, we minimized the effects of shorter-term climate cycles  
231 (e.g. El Nino Southern Oscillation; Dettinger *et al.* 1998) that may have influenced results. A p-  
232 value of < 0.1 was used to represent statistical significance. Results were provided as boxplots  
233 partitioned by wetland hydroperiod (i.e., temporary, seasonal, semi-permanent) and functional  
234 groups (e.g., closed-basin lakes and cultivated rice).

235 Change detection analysis was used to identify wetland declines as functional or physical  
236 loss (*see* Supplemental Materials - Methods, Section 2). Functional losses were attributed to  
237 areas of diminishing surface water area (i.e., drying) associated with shifts in ecosystem water  
238 balance or water management in the absence of physical alterations to the wetland. Physical  
239 losses were attributed to land-use conversion (e.g., urban expansion or shifting agricultural  
240 practices), resulting in habitat decline. In addition, we estimated the proportional contribution of  
241 functional groups to overall wetland abundance by totaling their monthly surface water areas for  
242 P1 and P2 and dividing by their overall period sum. This approach was also used to estimate the  
243 proportional abundance of wetlands and flooded agriculture. Flooded agriculture proportions

244 were calculated using only seasonal and temporary wetlands due to their habitat similarities  
 245 supporting waterbird foraging guilds associated with shallow and seasonally intermittent surface  
 246 water.

247

### 248 2.3 Waterbird habitat trends

249 We linked changes in monthly wetland hydrology and flooded agriculture in SONEC and the  
 250 Central Valley to a suite of 33 migratory waterbirds grouped loosely by taxa and foraging guilds  
 251 (Table 2). We defined an 'other waterbird' group that was taxonomically more diverse to act as a  
 252 catch-all that included selected birds in diving, fishing, and wading guilds. Waterbird species  
 253 were representative of a diversity of interdependent life-cycle events and habitat niches  
 254 associated with SONEC and Central Valley. To align seasonal waterbird abundance with  
 255 wetland and agricultural trends, the eBird Basic Data set (EBD) from the Cornell Laboratory of  
 256 Ornithology was used (Sullivan *et al.* 2009). EBD was essential for constructing seasonal  
 257 abundance patterns for species monitored infrequently by government wildlife agencies (e.g.,  
 258 shorebirds and wading birds). eBird is the largest citizen science platform globally, documenting  
 259 avian-species distribution and abundance within a mobile scientific platform that ingests over  
 260 100 million observations annually.

261

262 Table 2. Waterbird species used in wetland cross-regional niche assessment.

| Shorebirds                                               | Dabbling ducks                                    |
|----------------------------------------------------------|---------------------------------------------------|
| American avocet ( <i>Recurvirostra americana</i> )       | American wigeon ( <i>Mareca americana</i> )       |
| Black-necked stilt ( <i>Himantopus mexicanus</i> )       | Cinnamon teal ( <i>Spatula cyanoptera</i> )       |
| Dunlin ( <i>Calidris alpina</i> )                        | Gadwall ( <i>Mareca strepera</i> )                |
| Greater yellowlegs ( <i>Tringa melanoleuca</i> )         | Green-winged teal ( <i>Anas crecca</i> )          |
| Lesser yellowlegs ( <i>Tringa flavipes</i> )             | Mallard ( <i>Anas platyrhynchos</i> )             |
| Long-billed dowitcher ( <i>Limnodromus scolopaceus</i> ) | Northern pintail ( <i>Anas acuta</i> )            |
| Marbled godwit ( <i>Limosa fedoa</i> )                   | Northern shoveler ( <i>Spatula clypeata</i> )     |
| Western sandpiper ( <i>Calidris mauri</i> )              |                                                   |
| Willet ( <i>Tringa semipalmata</i> )                     |                                                   |
| Wilson's phalarope ( <i>Phalaropus tricolor</i> )        |                                                   |
| Wilson's snipe ( <i>Gallinago delicata</i> )             |                                                   |
| Whimbrel ( <i>Numenius phaeopus</i> )                    |                                                   |
| Diving ducks                                             | Other waterbirds                                  |
| Goldeneye* ( <i>Bucephala spp.</i> )                     | American bittern ( <i>Botaurus lentiginosus</i> ) |



|                                             |                                                    |
|---------------------------------------------|----------------------------------------------------|
| Bufflehead ( <i>Bucephala albeola</i> )     | American coot ( <i>Fulica americana</i> )          |
| Canvasback ( <i>Aythya valisineria</i> )    | Black tern ( <i>Chlidonias niger</i> )             |
| Scaup** ( <i>Aythya spp.</i> )              | Eared grebe ( <i>Podiceps nigricollis</i> )        |
| Redhead ( <i>Aythya americana</i> )         | Least bittern ( <i>Ixobrychus exilis</i> )         |
| Ring-necked duck ( <i>Aythya collaris</i> ) | Western grebe ( <i>Aechmophorus occidentalis</i> ) |
| Ruddy duck ( <i>Oxyura jamaicensis</i> )    | White-faced ibis ( <i>Plegadis chihi</i> )         |

263 \*Includes common (*B. clangula*) and Barrow's (*B. slandica*) goldeneye

264 \*\*Includes greater (*A. marila*) and lesser (*A. affinis*) scaup

265

266 The Auk package (Strimas-Mackey *et al.* 2018) was used to extract regional EBD count  
267 and presence data for all waterbird species collected from 1984 to 2020. Due to the relatively  
268 recent deployment of eBird, most observations used in our analysis were acquired post-2008.

269 Following Strimas-Mackey (2018) EBD best practices, we restricted data to 1) standard  
270 'traveling' and 'stationary' count protocols, 2) complete checklists, 3) observation length < 5  
271 hours, 4) effort-distance to  $\leq 5$  km, and 5) number of observers  $\leq 10$ . Results from EBD queries

272 were binned by month (to align with wetland-agricultural monitoring outputs) and summed  
273 across years to calculate proportional waterbird abundance as a relative measure of regional bird

274 use over time. Results were presented as bubble plots for each species by region to illustrate  
275 monthly patterns of cross-seasonal reliance (*see example*, Figure 2). Although we recognize  
276 differences in climate, weather, and disturbance can influence seasonal bird abundance, we  
277 intended to estimate long-term norms for comparison to wetland trends.

278

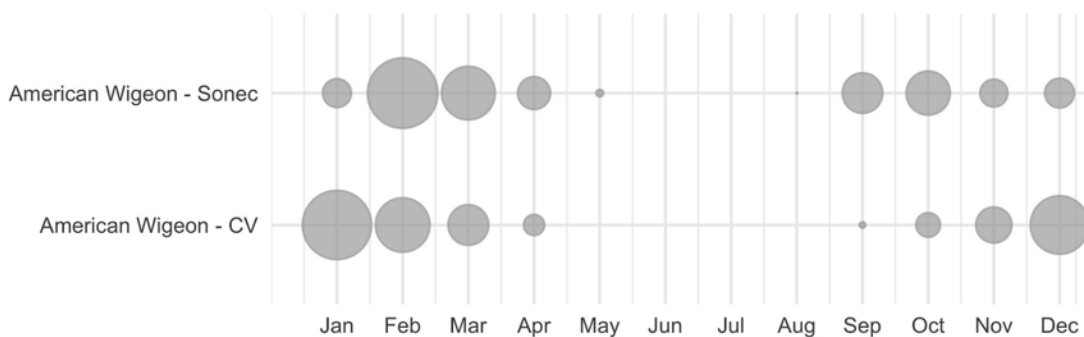

279

280 Figure 2. Example: SONEC and Central Valley (CV) cross-seasonal waterbird distributions  
281 depicted with American Wigeon. Dot size illustrates proportional abundance by region and  
282 month (Jan-Dec). High winter use (Jan) in CV shifts to SONEC during spring migration (Feb-  
283 Mar), while high SONEC use during fall migration (Sep-Nov) transitions back to Central Valley  
284 for winter (Dec). Bird absence from May to August indicates breeding is focused outside these  
285 regions.

286

287           When applied at broad scales, past studies have shown EBD observations equivalent to  
288 traditional survey efforts (Callaghan and Gawlik 2015; Walker and Taylor 2017). For added  
289 assurances, we compared (using non-parametric Wilcoxon tests) EBD-derived abundance  
290 distributions to results from aerial and ground surveys conducted in SONEC and the Central  
291 Valley. Although the majority of EBD observations included in our analysis were acquired post-  
292 2008, comparisons to traditional long-term (1984-2016) and near-term (2011-2017) waterbird  
293 surveys showed no significant differences ( $p$ -value  $<0.05$ ) in seasonal abundance patterns  
294 (Figure S1-3). Detailed methods and results outlining this analysis are provided as supplemental  
295 material (*see* Supplemental Materials - Methods, Section 3).

296           Patterns of seasonal waterbird abundance were linked to monthly wetland trends using a  
297 rule-based approach to identify emerging bottlenecks in niche availability broadly. Species were  
298 first assigned to one or more wetland hydroperiod classes (temporary, seasonal, and/or semi-  
299 permanent) representative of their seasonal habitat utilization. Flooded agriculture was an  
300 additional factor for species reliant on those habitats. Diving ducks, American coot, black tern,  
301 eared grebe, and western grebe were associated with semi-permanent wetlands that are  
302 representative of deeper open-water refugia and food resources preferred by these species.  
303 Dabbling ducks, American bittern, and white-faced ibis were associated with all wetland  
304 hydroperiod classes and flooded agriculture to encompass the diversity of their habitat  
305 utilization. As an exception, cinnamon teal, gadwall, and mallard were associated with semi-  
306 permanent wetlands from April to September when regional populations are heavily reliant on  
307 these habitats during brood rearing (Apr-Jul) and 25-40 day flightless molt periods (Aug-Sep;  
308 Kohl *et al.* in press). A similar rule was applied to American wigeon, green-winged teal, northern  
309 pintail, and northern shoveler to account for their minor breeding and molting occurrences in  
310 SONEC. However, April and September were excluded to prevent overlap with migrating  
311 populations that occurred in much higher abundance during those months.

312           Shorebird habitat assessments in SONEC were restricted to large terminal lake basins  
313 (Abert, Alkali, Goose, Harney, Honey, Summer, and Warner) identified as regionally and  
314 internationally important to sustaining populations (Senner *et al.* 2016). However, we  
315 acknowledge shorebird use in other wetland systems. Habitat associations included semi-  
316 permanent, seasonal, and temporary wetlands. Seasonal and temporary wetlands are commonly  
317 correlated with shallow water that are important foraging requisites for shorebird species, while  
318 semi-permanent (i.e., littoral-lacustrine) wetland trends have been identified as a key indicator of  
319 lake salinity linked trophic function supporting shorebird energetic needs (Senner *et al.* 2018).  
320 Shorebirds in the Central Valley were associated with all wetland classes in addition to flooded  
321 agriculture to account for a greater diversity of hydrologic conditions and habitat use driven by  
322 human-controlled flooding (Reiter *et al.* 2015).

323           Species-wetland associations were used as a template to interpret how wetland-  
324 agricultural trends were likely to affect habitat availability. To illustrate regional relationships  
325 between monthly waterbird abundance and wetland-agricultural change, species bubble plots  
326 were color-coded (Figure 3). Red (significant impacts) indicated declines to half or more of

327 wetland types, including agriculture, supporting a species habitat niche. Yellow (moderate  
328 impact) indicated declines to a minority of associated wetland-agricultural classes. Blue (stable)  
329 indicated stable-to-increasing wetland-agricultural conditions across all associated classes.  
330 Wetland declines were determined through statistical inference using p-values < 0.1 derived  
331 from Wilcoxon rank order test (*see Methods section 2.2 Wetland trends*). Habitat conditions for  
332 species associated with fewer than three wetland classes (i.e., diving ducks and SONEC  
333 shorebirds) could only be assessed as 'significantly declining' or 'stable/increasing.'  
334

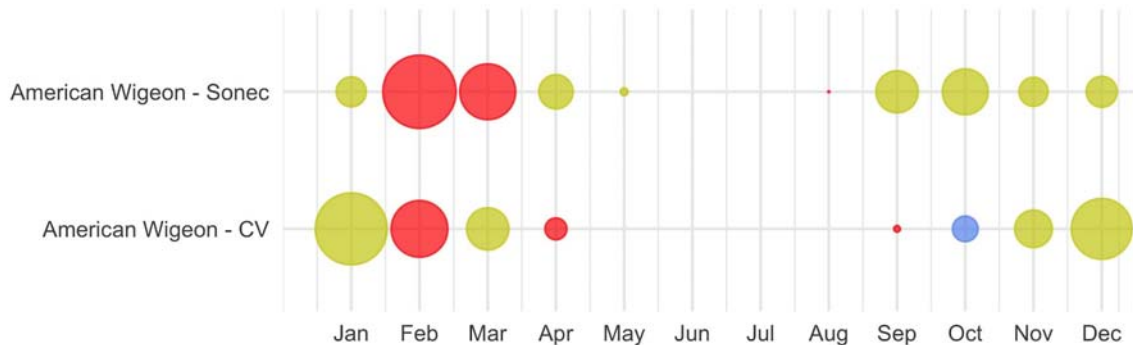

335  
336 Figure 3. Example: SONEC and the Central Valley (CV) cross-seasonal waterbird distributions  
337 depicted for American wigeon. Dot size illustrates proportional abundance by region and month  
338 (Jan-Dec). Colors represent wetland-agriculture trends underlying a species habitat niche. Red  
339 indicates 'significant impacts'—declines to a majority of wetland-agricultural habitats utilized by  
340 a species. Yellow indicates 'moderate impacts'—declines to a minority of wetland-agricultural  
341 habitats used. Blue indicates stable conditions.  
342

### 343 2.4 Data Processing

344 All image processing and raster-based analyses were conducted using the Google Earth Engine  
345 cloud-based geospatial processing platform (Gorelick *et al.* 2017). GIS analyses were performed  
346 using QGIS (QGIS Development Team 2020). Plotting and statistical analyses were conducted  
347 using the R environment (R Core Team 2019; RStudio Team 2019), including R-package  
348 tidyverse (Wickham *et al.* 2019).  
349

### 350 3. Results

351 All wetland and agricultural results are provided as median differences of monthly surface water  
352 extent between P1 (1988-2004) and P2 (2005-20) derived from Wilcoxon ranked-order tests—  
353 statistical significance was determined as p-value < 0.1. Annual variability is presented using  
354 boxplots for visual comparison of monthly P1 and P2 wetland trends. Detailed results supporting  
355 our analyses are provided as supplemental material for all wetland hydroperiods and functional  
356 groups discussed below (*see Supplemental Materials - Results, Tables S1-10, Figures. S1-7*).  
357

### 358 3.1 SONEC wetlands - agriculture

359 Wetland change in SONEC was driven by functional decline as indicated by the continuous  
360 drying of semi-permanent wetlands consistent across functional groups (i.e., wildlife refuges and  
361 public-private lands). Outside periods of winter freezing, overall losses ranged from 27% (Mar)  
362 to 46% (Oct, Figure 4, Table S1). Significant seasonal and temporary wetland losses were  
363 limited to July when surface water declined 28% and 49% (Figure 4, Table S1). Compared to  
364 overall trends, seasonal wetland loss was more expansive on wildlife refuges and public lands  
365 (e.g., National Forest), showing declines beginning in May and lasting through September  
366 (Tables S3-4, Figures S6-7). Closed-basin lakes were the only functional group to exhibit  
367 positive seasonal (167%, Mar) and temporary (268%, Jun) wetland trends (Table S2, Figure S5)  
368 that offset drying in other functional groups. Flooded agriculture remained relatively stable over  
369 time, except for February and July, when surface water area declined 21% and 22% (Figure 5,  
370 Table S6). Land-use change in SONEC resulted in less than 300 ha of surface water loss in  
371 flooded agriculture, attributed to the conversion of flood irrigation to sprinkler use in grass hay  
372 agriculture.  
373

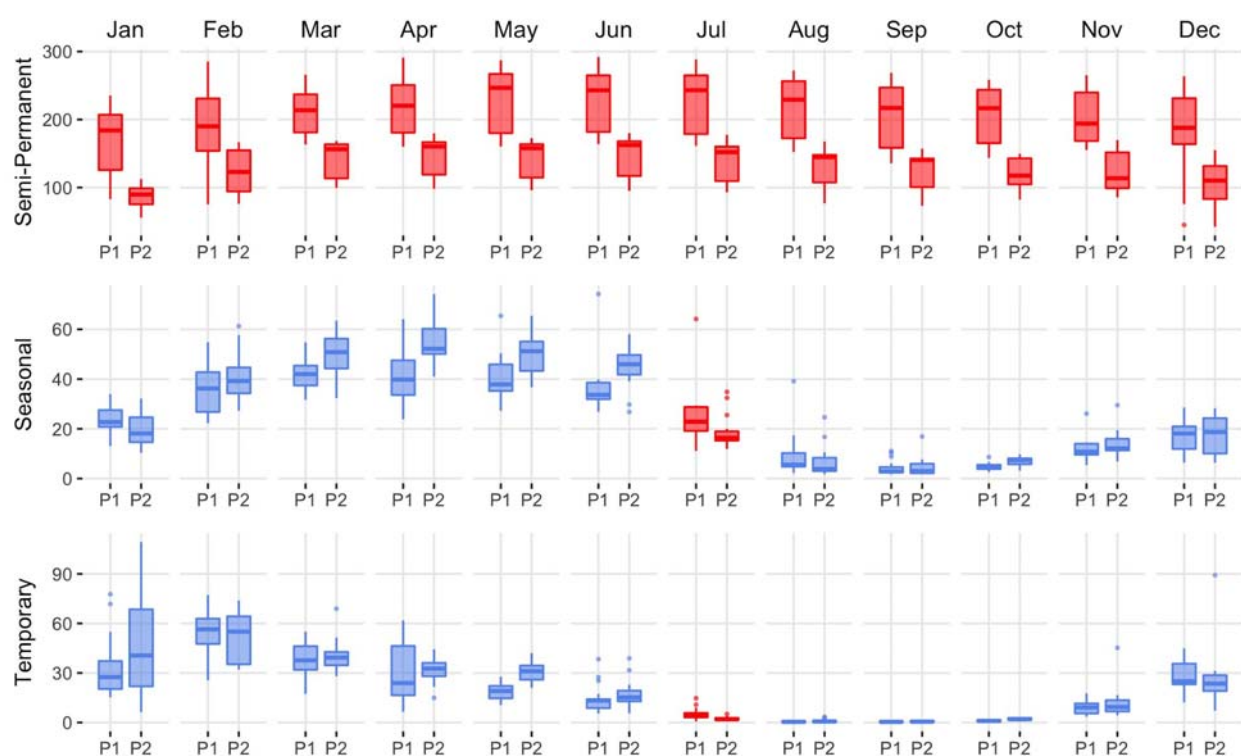

374  
375 Figure 4. SONEC overall distribution of monthly wetland abundance (kha) between 1988-2004  
376 (P1) and 2005-20 (P2) periods. Summaries include all wetlands associated with closed basin  
377 lakes, wildlife refuges, and public-private lands. Statistical inference was determined as p-values  
378 < 0.1 derived from Wilcoxon ranked order test. Red indicates significant wetland decline, and  
379 blue indicates stable to increasing wetland abundance. Results are partitioned by wetland

380 hydroperiod (semi-permanent, seasonal, temporary). Boxes, interquartile range (IQR); line  
 381 dividing the box horizontally, median value; whiskers, 1.5 times the IQR; points, outliers.  
 382

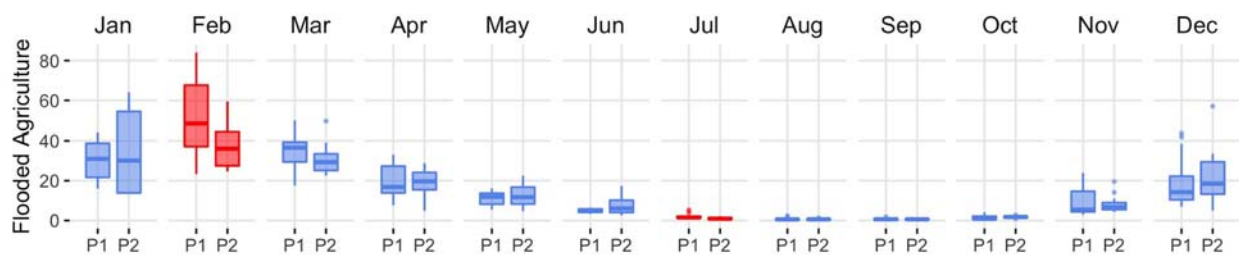

383  
 384 Figure 5. SONEC distribution of monthly flooded agriculture abundance (kha) between 1988-  
 385 2004 (P1) and 2005-20 (P2) periods. Statistical inference was determined as p-values < 0.1  
 386 derived from Wilcoxon ranked order test. Red indicates significant wetland decline, and blue  
 387 indicates stable to increasing wetland abundance. Boxes, interquartile range (IQR); line dividing  
 388 the box horizontally, median value; whiskers, 1.5 times the IQR; points, outliers.  
 389

390 Flooded agriculture in SONEC accounted for 76% and 73% of potential waterbird habitat  
 391 annually during P1 and P2— as estimated using only seasonal and temporary wetlands due to  
 392 similarities supporting waterbird guilds associated with shallow-water habitats (e.g., dabbling  
 393 ducks, shorebirds, and white-faced ibis). We acknowledge, however, that this measure was based  
 394 only on surface water area and did not consider greater diversity and ecological value typically  
 395 attributed to wetland systems. Closed basin lakes made up the largest semi-permanent wetlands  
 396 proportion, accounting for ~76% of overall abundance (Table 3). However, most of this area was  
 397 represented by open water lacustrine systems with limited habitat values for most waterbird  
 398 species. Seasonal and temporary wetlands were well distributed among functional groups that  
 399 made up a minimum of 21% and a maximum of 32% of overall abundance (Table 3). Wetland  
 400 distributions remained relatively stable between periods, except for littoral seasonal and  
 401 temporary wetlands in closed basin lakes. These increased proportionally from 32% to 43% and  
 402 from 20% to 33%.  
 403

404 Table 3. SONEC proportional wetland abundance by functional group and hydroperiod for P1  
 405 (1988-2020) and P2 (2005-20).

| Hydroperiod | Functional group   | P1 (1988-2004) | P2 (2005-20) | % Difference |
|-------------|--------------------|----------------|--------------|--------------|
| semi-perm.  | Closed-basin lakes | 77%            | 75%          | -2%          |
|             | Private lands      | 8%             | 10%          | 1%           |
|             | Public lands       | 8%             | 8%           | 0%           |
|             | Wildlife refuges   | 7%             | 8%           | 1%           |
|             | Closed basin lakes | 32%            | 43%          | 11%          |

|           |                    |     |     |     |
|-----------|--------------------|-----|-----|-----|
| seasonal  | Private lands      | 22% | 19% | -3% |
|           | Public lands       | 25% | 19% | -7% |
|           | Wildlife refuges   | 21% | 19% | -2% |
| <hr/>     |                    |     |     |     |
| temporary | Closed basin lakes | 20% | 33% | 13% |
|           | Private lands      | 30% | 25% | -6% |
|           | Public lands       | 26% | 25% | -2% |
|           | Wildlife refuges   | 24% | 18% | -6% |

406

### 407 3.2 Central Valley wetlands - agriculture

408 Functional loss was the driver of wetland declines in the Central Valley as there was little  
 409 evidence of physical impacts from land-use change. Drying of semi-permanent wetlands was  
 410 persistent, occurring 6 out of 12 months with losses ranging from 9% (Apr) to 20% (Jan; Figure.  
 411 6, Table S7). Semi-permanent losses on wildlife refuges and duck clubs accounted for 60% and  
 412 40% of overall declines (Tables S8-9, Figures S9-10). September and October were the only  
 413 months to exhibit stable semi-permanent wetland trends. Drying of seasonal and temporary  
 414 wetlands was significant from April through August and September, with declines ranging from  
 415 25% to 57% (Figure 6, Table S7). Although the relative change in wetland area was low,  
 416 declines coincided with annual minimums when most wetlands in the region were dry. Overall  
 417 seasonal and temporary declines were representative of wetland losses on wildlife refuges and  
 418 duck clubs. Other monthly declines included temporary wetlands in February (55%). Flooded  
 419 agriculture increased in November, December, and January by 76%, 68%, and 29%, respectively  
 420 (Figure 7, Table S10). Other monthly increases to flooded agriculture occurred in June (17%).

421

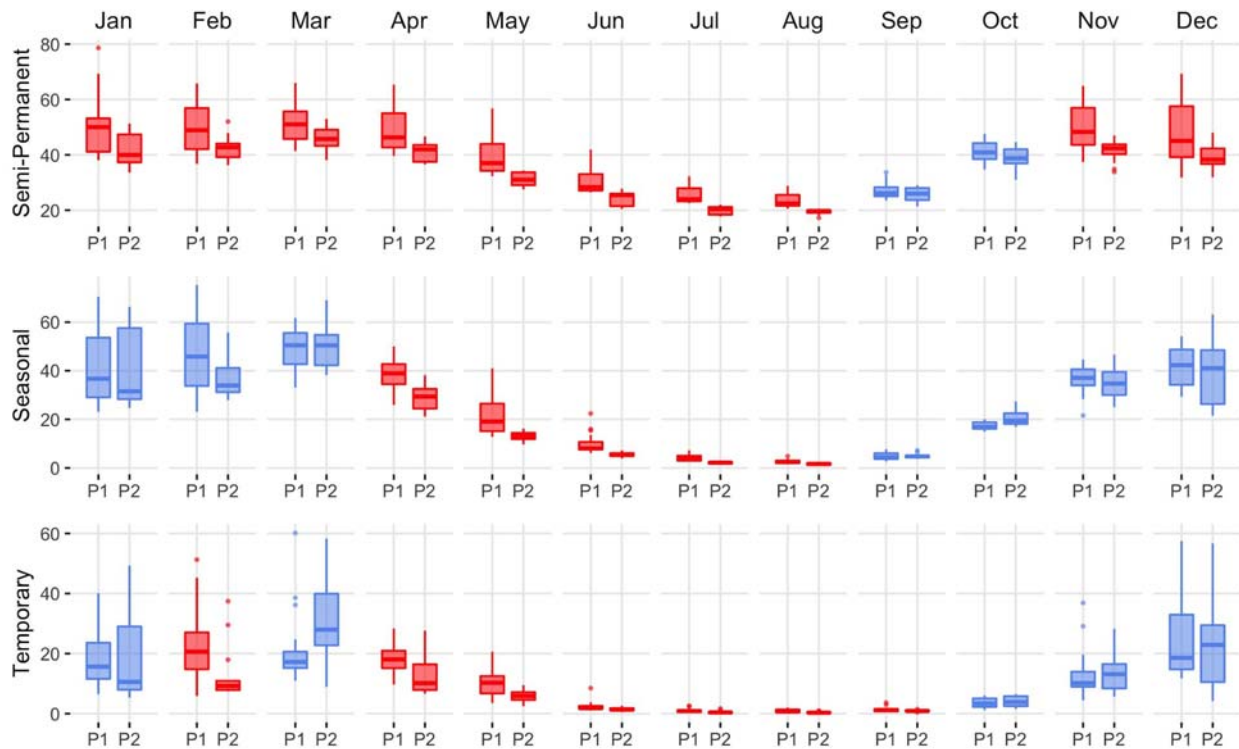

422  
423  
424  
425  
426  
427  
428  
429  
430

Figure 6. Central Valley distribution of monthly wetland abundance (kha) from 1988-2004 (P1) and 2005-20 (P2). The summary includes all wetlands on duck clubs and wildlife refuges. Statistical inference was determined as p-values < 0.1 derived from Wilcoxon ranked order test. Red indicates significant wetland decline, and blue indicates stable to increasing wetland abundance. Results are partitioned by wetland hydroperiod (semi-permanent, seasonal, temporary). Boxes, interquartile range (IQR); line dividing the box horizontally, median value; whiskers, 1.5 times the IQR; points, potential outliers.

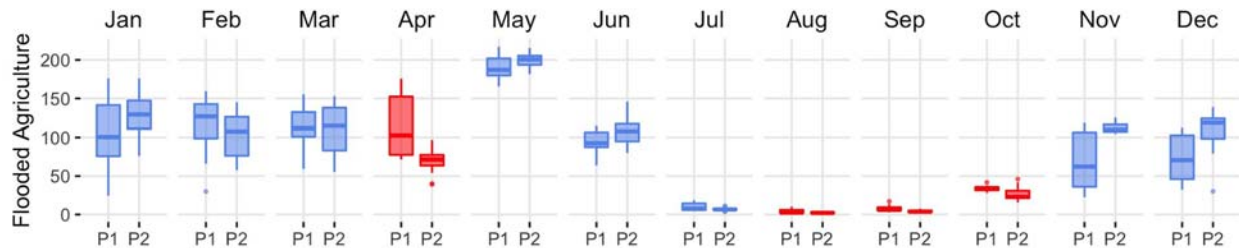

431  
432  
433  
434  
435  
436  
437  
438  
439

Figure 7: Central Valley distribution of monthly flooded agricultural abundance (kha) from 1988-2004 (P1) and 2005-20 (P2). Statistical inference was determined as p-values < 0.1 derived from Wilcoxon ranked order test. Red indicates significant decline, and blue indicates stable to expanding flooded agriculture. Boxes, interquartile range (IQR); line dividing the box horizontally, median value; whiskers, 1.5 times the IQR; points, potential outliers. Trends excluded closed basin lakes to prevent bias from large deepwater areas with minimal waterbird value.

440 Duck clubs accounted for over two-thirds of semi-permanent wetlands and nearly three-  
 441 quarters of seasonal and temporary wetlands in the Central Valley annually, with the remainder  
 442 occurring on wildlife refuges (Table 4). The proportional abundance of wetlands between duck  
 443 clubs and wildlife refuges changed little over time ( $\pm 0.5\%$ ). Flooded agriculture made up 81%  
 444 and 83% of potential waterbird habitat annually during P1 and P2. Estimates were made using  
 445 only seasonal and temporary wetlands due to habitat similarities supporting waterbird foraging  
 446 guilds associated with shallow and seasonally intermittent surface water. Flood irrigation of rice  
 447 from April to August and post-harvest flooding for rice stubble from October to February made  
 448 up the vast majority of agricultural habitat. Rice was the only waterbird habitat impacted by  
 449 land-use change (i.e., physical loss) resulting from conversion to orchards and urban  
 450 development. Losses were minor, representing  $< 4\%$  of the cultivated footprint. Monthly patterns  
 451 of flooded rice depicted by our models (Figure 7) aligned with seasonal irrigation practices  
 452 (University California Davis 2018) and estimates of the cultivated area reported for the region  
 453 (Geisseler and Horwath 2016). We acknowledge low seasonal wetland estimates in July and  
 454 August were likely due to dense emergent rice cover visually obscuring areas of shallow surface  
 455 water beneath.

456

457 Table 4. Central Valley proportional wetland abundance by functional group and hydroperiod for  
 458 P1 (1988-2020) and P2 (2005-20).

| Hydroperiod | Functional group | P1 (1988-2004) | P2 (2005-20) | Difference | % |
|-------------|------------------|----------------|--------------|------------|---|
| semi-perm.  | Duck clubs       | 68%            | 68%          | -0.5%      |   |
|             | Wildlife refuges | 32%            | 32%          | 0.5%       |   |
| seasonal    | Duck clubs       | 72%            | 72%          | 0%         |   |
|             | Wildlife refuges | 28%            | 28%          | 0%         |   |
| temporary   | Duck clubs       | 72%            | 71%          | -0.5%      |   |
|             | Wildlife refuges | 28%            | 29%          | 0.5%       |   |

459

### 460 3.3 Waterbird and wetland indicators

461 Wetland declines aligned with key cross-seasonal habitat needs supporting waterbirds in SONEC  
 462 and the Central Valley. Indicators of significant and moderate habitat impacts were prevalent  
 463 across all 33 waterbird species (Figures 8, 9). Diving ducks exhibited the broadest indications of  
 464 habitat loss in SONEC and the Central Valley, resulted from semi-permanent wetland declines  
 465 overlapping important stopover, breeding, molting, and wintering periods (Figure 8). Stable to  
 466 increasing semi-permanent wetland trends during September and October showed only minor  
 467 overlap with resident diving duck populations (i.e., ruddy duck and redhead) in the Central  
 468 Valley. Similar impacts were associated with American coot, black tern, eared grebe, and  
 469 western grebe because of their heavy reliance on semi-permanent wetland habitats (Figure. 9).



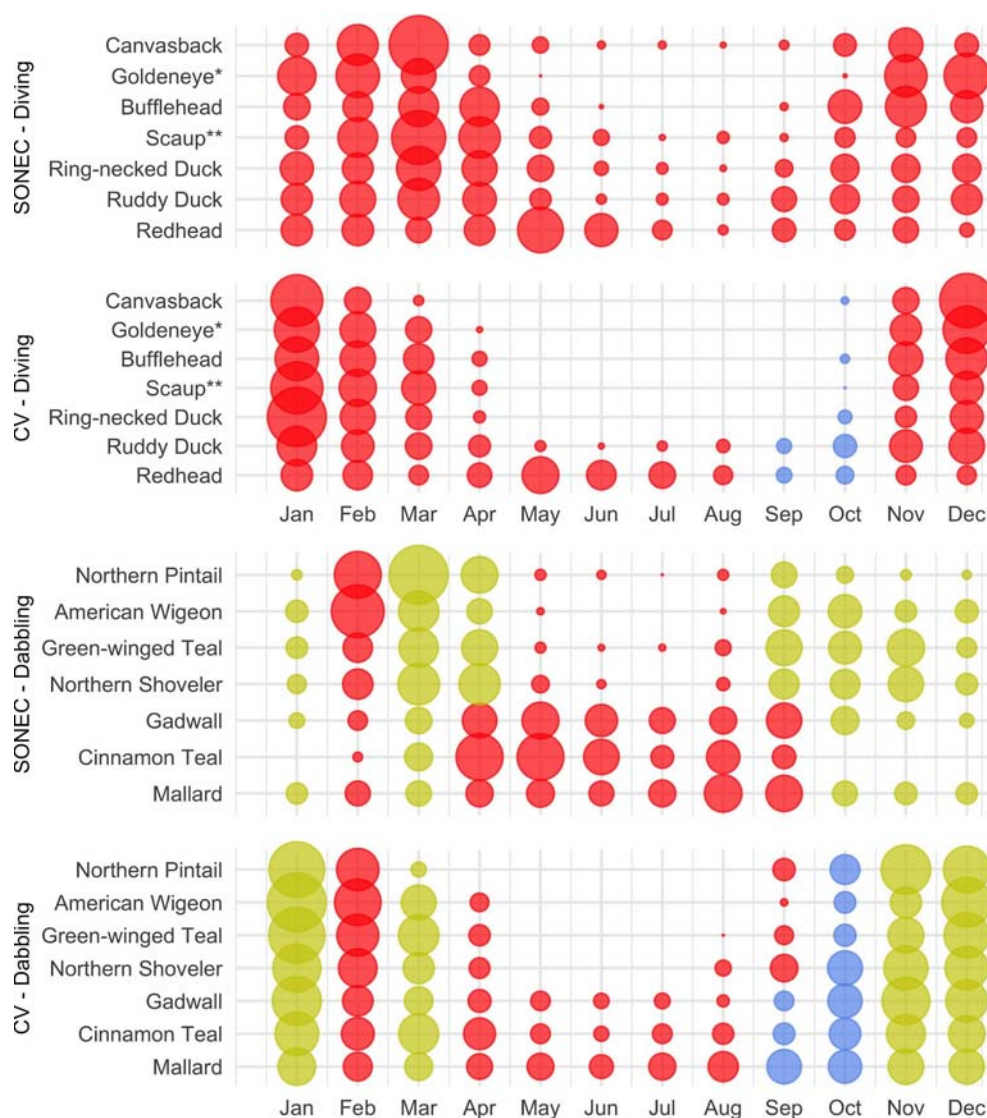

470  
 471 Figure 8. SONEC and Central Valley (CV) monthly diving and dabbling duck distributions. Dot  
 472 size illustrates proportional abundance from January to December. Large dots represent seasonal  
 473 concentrations of birds associated with wintering and migrating behaviors. Similar-sized dots  
 474 occurring over many months represent continuous bird abundance related to regional  
 475 populations. Colors are indicators of habitat impacts related to changes to flooded agriculture and  
 476 wetland (i.e., semi-permanent, seasonal, and temporary) abundance. Red indicates ‘significant  
 477 impacts’—declines to a majority of wetland-agricultural habitats utilized by a species. Yellow  
 478 indicates ‘moderate impacts’—declines to a minority of wetland-agricultural habitats used. Blue  
 479 indicates stable conditions. \*Includes common and Barrow’s goldeneye. \*\*Includes greater and  
 480 lesser scaup.  
 481

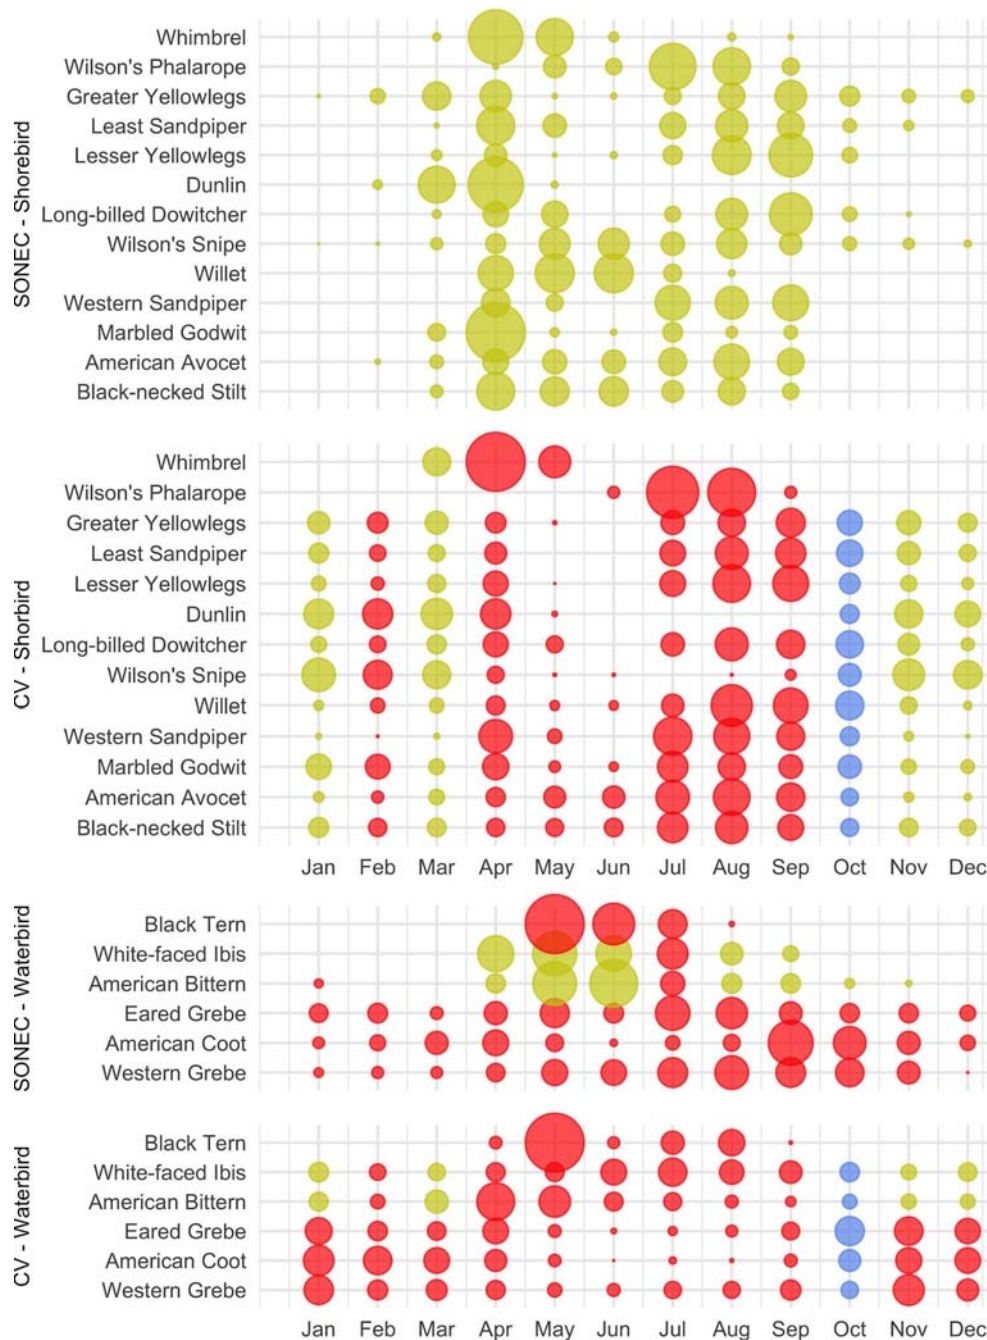

482  
 483 Figure 9. SONEC and Central Valley (CV) seasonal shorebird and waterbird distributions. Dot  
 484 size illustrates proportional abundance from January to December. Large dots represent seasonal  
 485 concentrations of birds associated with wintering and migrating behaviors. Similar-sized dots  
 486 occurring over many months represent continuous bird abundance related to regional  
 487 populations. Colors are indicators of habitat impacts related to changes to flooded agriculture and  
 488 wetland (i.e., semi-permanent, seasonal, and temporary) abundance. Red indicates 'significant  
 489 impacts' — declines to a majority of wetland-agricultural habitats utilized by a species. Yellow

490 indicates ‘moderate impacts’—declines to a minority of wetland-agricultural habitats used. Blue  
491 indicates stable conditions.

492

493 Indicators of habitat declines were moderate for wintering (Dec-Jan) dabbling ducks in  
494 the Central Valley. Moderate impacts were associated with semi-permanent wetland declines on  
495 duck clubs and wildlife refuges (Figure. 8). Expansion of flooded agriculture (i.e., post-harvest  
496 flooding of rice) was also prevalent during Central Valley wintering periods (Nov-Jan),  
497 substantially increasing habitat availability. Decreasing semi-permanent and temporary wetland  
498 abundance were indicators of significant and moderate impacts to spring dabbling duck  
499 migration (Feb-Apr) in SONEC and the Central Valley. Flooded agriculture also declined 15%  
500 during February Central Valley spring migration (Table S10) but did not meet our threshold of  
501 statistical inference for wetland change—this decline resulted in a substantial loss of wetland  
502 habitat.

503 Habitat declines during fall dabbling duck migration were moderate for non-molting  
504 species in SONEC (Sep-Oct) and moderate and stable for all species in the Central Valley (Oct-  
505 Nov). Semi-permanent and seasonal wetland declines were the primary indicators of habitat  
506 impact. Declining semi-permanent wetlands overlapping cinnamon teal, gadwall, and mallard  
507 use were significant indicators of reduced breeding and molting habitat availability from April to  
508 September. In September, stable semi-permanent wetland trends showed only minor overlap  
509 with dabbling duck molt periods in the Central Valley.

510 Habitat indicators for SONEC shorebirds were evaluated using wetland trends in closed  
511 basin lakes. While seasonal and temporary wetland abundance increased substantially in these  
512 sites (Table S2, Figure S5), habitat impacts were characterized as moderate to acknowledge  
513 concerns about long-term ecosystem sustainability linked to accelerated patterns of lake drying  
514 shown by semi-permanent wetland loss (*sensu* Senner *et al.* 2018). In the Central Valley, semi-  
515 permanent, seasonal, and temporary wetland declines on duck clubs and wildlife refuges were  
516 indicators of significant shorebird migration and breeding (Apr-Sep) habitat impacts. Impacts to  
517 wintering shorebird (Nov-Mar) habitat in the Central Valley were moderate due to declining  
518 semi-permanent wetland abundance in combination with stable to increasing flooded agriculture.  
519 February was a significant outlier because of additional temporary wetland loss. Stable to  
520 increasing wetland trends in October showed only minor overlap with wintering shorebirds.

521 Moderate impacts were attributed to American bittern and white-faced ibis for most of  
522 their migration and wintering periods (Oct-Mar) in the Central Valley due to the loss of semi-  
523 permanent wetlands (Figure 9). Outliers included stable conditions in October and significant  
524 impacts in February that resulted from declines in semi-permanent and temporary wetlands. In  
525 SONEC, declining semi-permanent wetlands during breeding and summering periods (Apr-Sep)  
526 resulted in moderate habitat impacts five out of six months (Figure 9). Significant impacts  
527 occurred in July when declines occurred across all wetland types in addition to flooded  
528 agriculture. Breeding and summering impacts in the Central Valley were significant due to

529 universal wetland declines from April to August. Significant impacts in September were due to  
530 reductions in temporary wetlands and flooded agriculture.

531

#### 532 4.0 Discussion

533 Our analysis was the first we are aware of using a diverse suite of waterbird species as a  
534 framework for examining seasonal effects of wetland change within a flyway network. Although  
535 linkages between wetlands and waterbirds were casual, results provide detailed insight into  
536 complex ecological trends and their relationship to interdependent life-cycle events. Network  
537 habitats were provided by aggregating flooded agriculture and public-private wetland resources,  
538 including wildlife refuges. Declining wetland trends overlapping key breeding, migration, and  
539 wintering events were indicators of system-wide habitat declines, aligning in part with 33  
540 waterbird species. This multi-species approach demonstrates the emergence of ecological  
541 bottlenecks through an improved understanding of wetland and waterbird interactions. Patterns  
542 of rapid wetland decline suggest that migratory networks in western North America may be  
543 approaching an ecological tipping point limiting their ability to support waterbird populations.

544 In both SONEC and the Central Valley, pervasive loss of semi-permanent wetlands were  
545 indicators of functional decline driven by cascading top-down effects that limited the availability  
546 of waterbird habitats. Losses resulted from shortened hydroperiods caused by excessive drying  
547 that forced the transition of semi-permanent to seasonal and temporary hydrologies—a process  
548 that in part offset concurrent seasonal and temporary wetland declines. Under this scenario,  
549 semi-permanent wetlands acted as a top-down index of ecosystem water balance decline due to  
550 their position at the top of the hydroperiod continuum. Similar patterns of functional decline  
551 have been observed in prairie and high-elevation wetland ecosystems that link accelerated drying  
552 to warming temperatures induced by climate change (McMenamin *et al.* 2008; Johnson *et al.*  
553 2010; Lee *et al.* 2015).

554 Ecological effects that favor seasonal and temporary wetland availability were reinforced  
555 by flooded agriculture that mimicked shallow, intermittent surface water habitat in SONEC and  
556 the Central Valley. High proportional abundance and resilience of flooded agriculture worked in  
557 conjunction with top-down functional declines in semi-permanent systems as an additional  
558 buffer to seasonal and temporary wetland losses and were a major determinant of habitat  
559 availability. For example, in the Central Valley, favorable fall-winter habitat conditions were  
560 driven by flooded rice fields, which our results showed increased by 28% to 78% from  
561 November to January and were by far the largest contributor to waterbird habitat availability  
562 (*sensu* Fleskes *et al.* 2018). Likewise, reliable flood irrigation of grass hay from February to  
563 April has resulted in stable surface water conditions that currently account for 60% of available  
564 dabbling duck habitat during spring migration in SONEC (Donnelly *et al.* 2019).

565 Persistent summer loss of seasonal and temporary wetlands outside closed basin lakes  
566 was indicative of expanding top-down patterns of functional decline. Trends suggest that some  
567 functional groups have reached a point where increased evaporative demands during summer  
568 now outpace masking effects from the transformation of semi-permanents to seasonal and

569 temporary hydroperiods. These patterns were most pronounced on public lands in SONEC (e.g.,  
570 National Forest), where seasonal wetlands declined between 19% and 63% from May through  
571 August. Changes in water use priorities and/or policies may have also exacerbated declines on  
572 duck clubs and wildlife refuges that rely on artificial flooding to actively manage wetland  
573 conditions (Rosen *et al.* 2009). In SONEC, wetland availability on wildlife refuges has been  
574 impacted by the reallocation of limited water supplies in support of mandates to protect  
575 endangered fish species (Doremus and Tarlock 2003). Additionally, the increased prevalence of  
576 mosquito-borne disease in the Central Valley has raised concerns over public safety (Githeko *et*  
577 *al.* 2000), leading to abatement measures that can significantly increase wetland management  
578 costs. Although the influence of mosquito control measures has not been quantified, they likely  
579 compound impacts of wetland declines because delayed flooding or intentional draining of  
580 wildlife refuges and duck clubs offers resource managers a low-cost solution to public health  
581 compliance (Berg *et al.* 2010).

582

#### 583 4.1 Waterbird implications

584 Our results identified a clear concentration of impacts for waterbird species dependent on  
585 semi-permanent wetlands (Figure 10). Diving ducks, black terns, and grebes showed the greatest  
586 potential impact due to heavy use of semi-permanent wetlands, including littoral-limnetic  
587 systems occurring in closed-basin lakes, that support their primary habitat niche. Unlike other  
588 waterbirds evaluated, these species faced distinct challenges due to the ubiquitous nature of  
589 semi-permanent wetland loss that extended potential impacts across entire annual life cycles.  
590 Moreover, the effects of these impacts were amplified by a limited habitat base that omitted  
591 agriculturally supported habitats. Although agriculture has played an essential role in providing  
592 habitat that has offset historical wetland loss (Fasola and Ruiz 1996; Elphick and Oring 2003;  
593 Gauthier *et al.* 2005; Fox *et al.* 2017), it has contributed little to semi-permanent systems  
594 requiring some waterbird species to rely solely on wildlife refuges and remaining natural wetland  
595 resources to meet habitat needs.

596

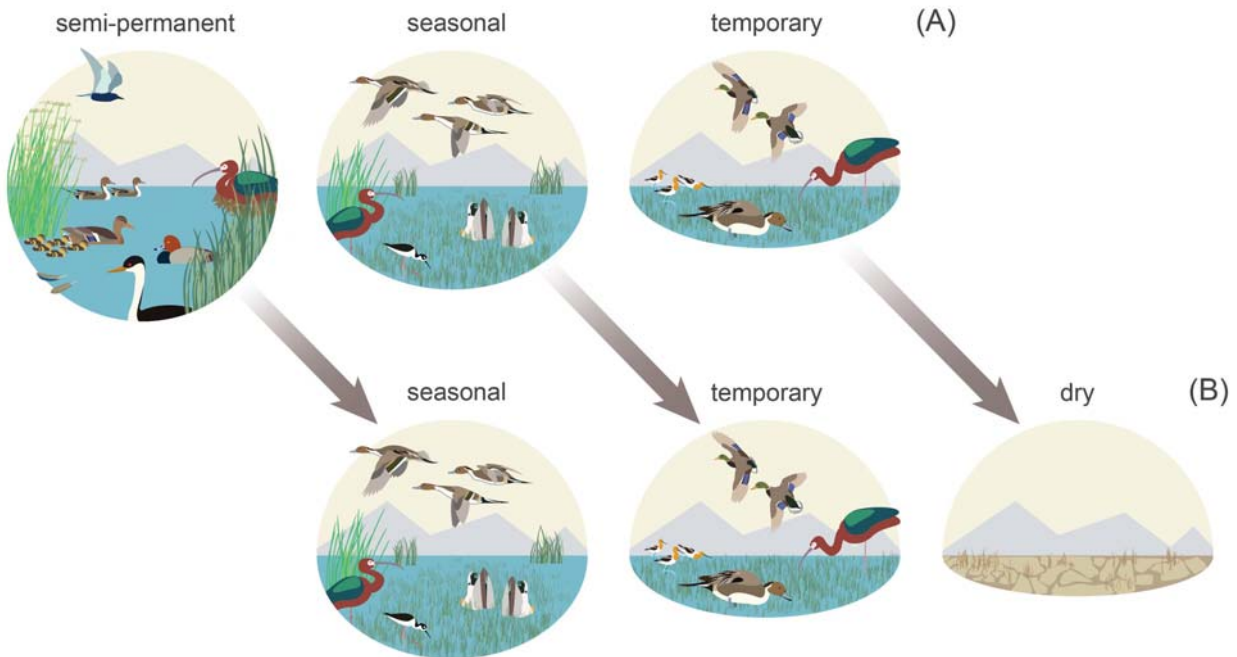

597  
598 Figure 10. Functional wetland declines indicate disproportionate impacts to waterbird species  
599 heavily reliant on semi-permanent wetlands during all or portions of their annual life-cycle.  
600 Diving ducks (redhead), black terns, and grebes (western grebe) showed the greatest potential  
601 impact in addition to nesting white-faced ibis and molting and breeding waterfowl (A). Semi-  
602 permanent losses resulted from shortened hydroperiods caused by excessive drying that forced  
603 the transition of these habitats to seasonal and temporary hydrologies—a process that offset  
604 concurrent seasonal and temporary wetland declines. Shorebirds (American avocets and black-  
605 necked stilts), migrating-wintering dabbling ducks (northern pintails and mallards), and white-  
606 faced ibis benefited from more persistent seasonal and temporary wetlands that were bolstered  
607 by stable agricultural habitats (B).

608  
609 Wintering and migrating dabbling ducks represented one of our analysis's least impacted  
610 habitat relationships (Figure 10). From October to April, birds benefited from relatively stable  
611 migration and wintering conditions in SONEC and the Central Valley. Conditions resulted from  
612 ecological trends, land-use, and management priorities on wildlife refuges and duck clubs that  
613 minimized impacts through a greater abundance of flooded agriculture (i.e., rice) and stable  
614 seasonal and temporary wetlands. Relationships were more complex for non-migratory dabbling  
615 ducks (i.e., cinnamon teal, gadwall, and mallard) that capitalized on reliable wintering conditions  
616 but were dependent on declining semi-permanent wetlands as breeding and molting habitat from  
617 April to September. Regionally declining cinnamon teal, gadwall, and mallard populations  
618 (Feldheim *et al.* 2018; USFWS 2020) and more persistent disease outbreaks may reflect impacts  
619 of degraded wetland conditions. In 2020, for example, ~60,000 molting waterfowl were lost on a  
620 single wildlife refuge in SONEC due to botulism attributed to warming water temperatures and

621 declining semi-permanent wetland abundance that concentrates birds in limited habitats  
622 (Sabalow 2020).

623 Near-term effects of functional declines are less likely to impact species reliant on  
624 seasonal and temporary wetlands (Figure 10). While our results showed fewer impacts to these  
625 systems, their long-term sustainability remains uncertain. Loss of littoral-lacustrine wetland  
626 systems in SONEC closed-basin lakes, for example, has resulted in the exponential growth of  
627 seasonal and temporary wetlands that has increased habitat availability for some species. This is  
628 vividly illustrated at Goose Lake in SONEC, which now functions as one of the most extensive  
629 seasonal wetlands in the Pacific Flyway (Figure 11). However, rapid drying of littoral-lacustrine  
630 wetland systems in SONEC saline lakes (e.g., Abert and Summer) raises concerns over trophic  
631 collapse due to increased salinity associated with lower water volumes. Higher salinity can  
632 drastically reduce the diversity and biomass of benthic macroinvertebrates that serve as critical  
633 food resources for shorebirds and eared grebes (*Podiceps nigricollis*). As water volumes  
634 continue to decrease, lakes can reach a point of infertility well before they dry entirely (Herbst  
635 2006; Moore 2016; Senner *et al.* 2018). The transition of some declining freshwater lakes to  
636 saline states (*sensu* Thomas 1995) may open habitat niches that offset losses in others. However,  
637 these lakes may also be vulnerable to collapse from salinity increases if lacustrine losses  
638 continue.  
639

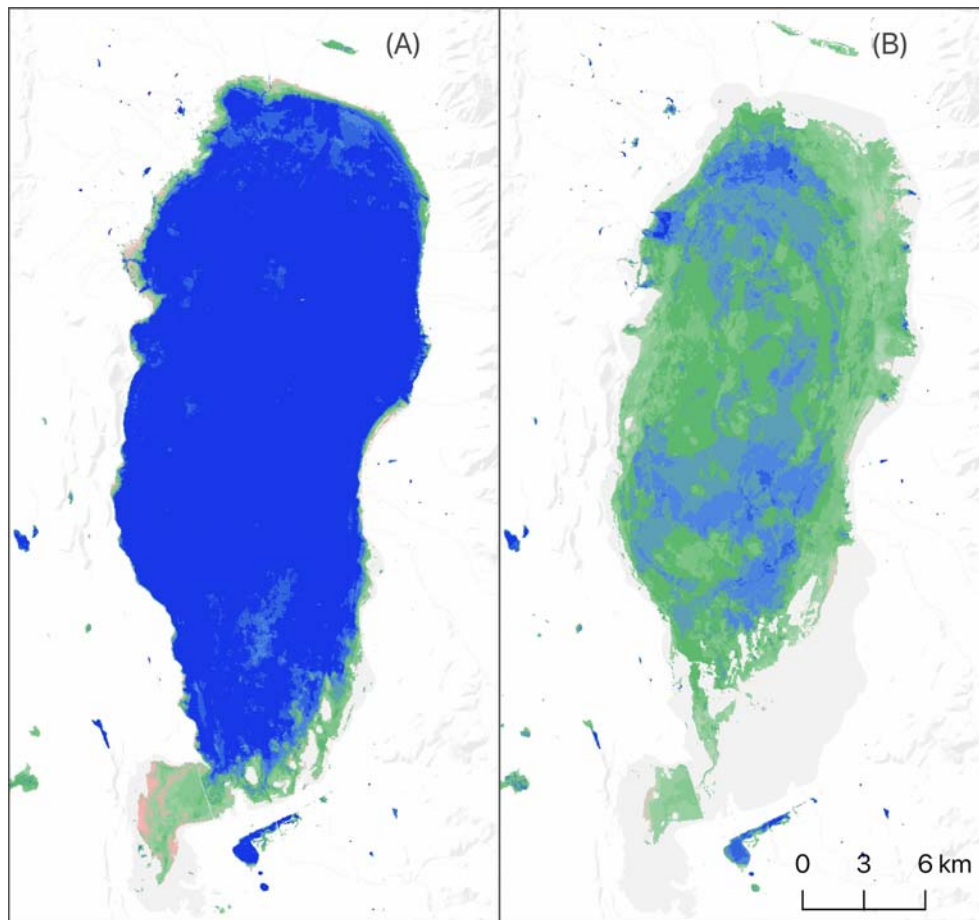

640

641 Figure 11. Model example: Goose Lake surface water and wetland hydroperiod extent June 1997  
642 (A) and 2016 (B). Conditions representative of top-down functional transformation shown as  
643 drying littoral-limnetic systems in closed-basin lakes that lead to increased seasonal wetland  
644 abundance. Hydroperiods are defined by annual length of flooding: blue—semi-permanent  
645 (flooded > 8 months), green—seasonal (flooded > 2 and  $\leq$  8 months), and pink—temporary  
646 (flooded  $\leq$  2 months). Darker color shades indicate longer periods of inundation within  
647 hydroperiod classes.

648  
649 Declining wetland trends on wildlife refuges and duck clubs from April to September  
650 were indicators of breeding shorebird impacts in the Central Valley. This region supports 24%  
651 and 17% of the U.S. breeding populations of American avocets and black-necked stilts,  
652 respectively (Shuford *et al.* 2007). Although most of these birds are known to breed in abundant  
653 flooded rice fields during spring (Shuford *et al.* 2007), conservation priorities identify the  
654 availability of wetlands on wildlife refuges and duck clubs as a vital factor sustaining habitat  
655 needs (USFWS 2020). However, current wetland trends suggest that it is unlikely that wildlife  
656 refuges and duck clubs have the flexibility to alter existing management priorities. Alternative  
657 solutions include emerging conservation incentive programs that work with agricultural  
658 producers to flood fields on private lands as a stopgap measure to overcome shorebird habitat  
659 deficits (Reynolds *et al.* 2017).

#### 660 661 4.2 Conservation needs

662 Impacts to waterbird migration networks identified in this study represent the early  
663 effects of climate change. A posthoc analysis of drought indices for both SONEC and the Central  
664 Valley (*see* Supplemental Materials - Recent Climate) identified intensifying patterns of drought  
665 over the study period. Changes were most pronounced in SONEC, where drought has become  
666 the regional norm since 2005 (Figure S11). Our findings suggest that drought effects are  
667 ubiquitous and can impact wetland function regardless of underlying hydrologic mechanisms  
668 (e.g., managed or natural). The Central Valley, for example, relies on reservoir storage capacity  
669 22 times greater than SONEC to attenuate drought by storing snow-melt runoff to provide water  
670 for agriculture and artificially managed wetlands (Table S11). Although these systems were  
671 developed to ensure reliable water supplies, higher frequency and more severe drought events  
672 (Diffenbaugh *et al.* 2015; Swain 2021) have triggered measures curtailing water deliveries to  
673 wildlife refuges (Rosen *et al.* 2009) that have mirrored more direct ecological effects of wetland  
674 loss within SONEC (Donnelly *et al.* 2020).

675 While the stability of agriculturally supported wetlands implies potential climate  
676 resilience, they are more vulnerable to indirect economic pressures related to increasing water  
677 scarcity that can significantly reduce wildlife benefits (Mann and Gleick 2015). Potential impacts  
678 are greatest in the Central Valley, where many waterbird species have become dependent on  
679 flooded agriculture (primarily flooded rice) that makeup ~75% of the region's habitat annually.  
680 Winter flooding of rice fields to remove post-harvest stubble was initially triggered by the



681 Federal Clean Air Act and subsequent California state legislation in 1991 that mitigated historic  
682 burning practices. Abundant water resources for winter decomposition of rice stubble (a boon for  
683 wetland habitats) offered an economically viable solution to burning. Our results showed  
684 producer adoption of this technique increased winter availability of agricultural habitats by as  
685 much as 78%, making it an indispensable component of the migratory network that has  
686 translated to higher waterbird survival and forage capacity (Fleskes *et al.* 2007, 2016; Strum *et*  
687 *al.* 2013). While we found minimal evidence of declining rice cultivation overall (<4%), new  
688 economic incentives for rice straw used in fiber-board manufacturing are providing producers  
689 alternatives to winter flooding as the reliability of irrigation water declines (Gibson 2019).

690 While our analysis did not measure surface and groundwater interactions directly,  
691 groundwater sustainability is crucial to maintaining surface water hydrology in most wetland  
692 ecosystems, particularly in arid and semi-arid regions in western North America (*sensu* Jolly *et*  
693 *al.* 2008). Recent work from Thomas *et al.* (2017) and Wang *et al.* (2016) identify clear linkages  
694 between intensifying meteorological drought and reduced groundwater storage. Moreover,  
695 Kibler *et al.* (2021) found that dieback of riparian vegetation (dependent on shallow alluvial  
696 aquifers) was a direct result of depleted groundwater during the 2012-19 California drought.  
697 Compounding declines are shifts in agricultural water consumption in SONEC and the Central  
698 Valley that increasingly rely on groundwater extraction as a primary irrigation source to offset  
699 surface water declines of ~30% over the past decade (Medellín-Azuara *et al.* 2015). Climate  
700 scenario planning to maintain agricultural production in the Central Valley has identified  
701 conversion to more profitable and water-saving crops as a viable solution that supports economic  
702 viability and recovers groundwater depletions to alleviate drought (Li *et al.* 2018). Indirect  
703 benefits of such actions may improve climate resilience in some wetland systems. Still, they may  
704 also result in a net loss of agricultural habitat by reducing water-intensive crops like rice that  
705 currently support large waterbird populations.

706 There was little indication that changing agricultural practices resulted in waterbird  
707 habitat loss in SONEC. Similar regions in the western United States, however, are under  
708 increasing pressure from climate-driven initiatives to adopt more efficient irrigation technology  
709 (e.g., center pivot sprinkler irrigation) and rotational fallowing that would transfer water savings  
710 to municipal use (Thorvaldson and Pritchett 2006; Welsh and Endter-Wada 2017). While these  
711 efforts seek viable solutions to climate change and urban water demands, they often disregard  
712 ecosystem services associated with flooded agriculture. For example, the common practice of  
713 flood irrigating grass hay (occurring predominantly in riparian floodplains, Donnelly *et al.* 2020)  
714 mimics once natural hydrologic processes. Still, it is frequently deemed an inefficient use of  
715 water (Richter *et al.* 2017). Instead, these practices have been shown to promote climate  
716 resiliency through groundwater recharge that generates late summer return flows in adjacent  
717 streams, benefiting waterbirds, fisheries, and riparian habitats (Blevins *et al.* 2016). Future  
718 protections of agriculturally supported wetlands in SONEC will likely require a better  
719 understanding of ecological tradeoffs associated with water reallocation as the need for climate  
720 change adaptations rise.

721 Climate forcing will likely continue to reshape SONEC and Central Valley wetland  
722 ecosystems. Recent projections from Snyder et al. (2019) show that by 2020-2050 regional  
723 temperatures will be  $\sim 1^{\circ}\text{C}$  to  $\sim 3^{\circ}\text{C}$  above the historical baseline of 1980-2010. More  
724 importantly, Cook et al. (2015) showed that rising temperatures driving increased  
725 evapotranspiration would lead to 'unprecedented' drought throughout the region. Our posthoc  
726 analyses of downscaled future climate data for SONEC and the Central Valley show a more  
727 intense and continuous drought (*see* Supplemental Materials - Future Climate). Projected  
728 changes are likely to force tradeoffs in water use priorities that could intensify ecological  
729 bottlenecks already identified in our analysis. Under these scenarios, it will become increasingly  
730 important to consider adaptations that preserve ecological and anthropogenic (e.g., flooded  
731 agriculture) mechanisms supporting wetland resilience. Emerging solutions include increased  
732 recognition of ecosystem services provided through beneficial agricultural practices by giving  
733 producers economic incentives to maintain flood irrigation. Recent efforts include a program in  
734 the Central Valley that uses winter-flooded rice fields (supporting waterbirds) to rear endangered  
735 chinook salmon smolt to increase fish survival (Holmes *et al.* 2021). In other regions of the  
736 western U.S., groups are exploring conservation exchange programs to establish a market for  
737 private investment in ecosystem services that will pay ranchers for maintaining flood irrigation  
738 practices in grass hay meadows that are mutually beneficial to wildlife and riparian sustainability  
739 (Duke *et al.* 2011; Blevins *et al.* 2016).

740 Conservation strategies that preserve climate resiliency must also consider adaptive  
741 measures needed to maintain overall flyway function. Intensifying water scarcity during future  
742 droughts could change the roles of SONEC and the Central Valley as waterbirds seek more  
743 productive landscapes to support stopover and wintering needs. Donnelly et al. (2020) identified  
744 nonlinear patterns of wetland drying in North American waterbird flyways that showed  
745 significant wetland impacts to snowmelt-driven systems in the western U.S., while monsoon-  
746 driven wetlands that overlap wintering waterbird distributions in Mexico remained stable or  
747 expanded over time. Migratory waterbirds are well adapted to take advantage of shifting  
748 continental conditions and have shown an ability to alter habitat use within flyways as climate  
749 change restructures resource availability (Lehikoinen *et al.* 2013; Pavón-Jordán *et al.* 2015).  
750 Under these scenarios, resource managers must be willing to proactively prioritize and adapt  
751 management strategies that reflect an evolution in waterbird habitat needs, including redirection  
752 of conservation investments to more resilient regions of the flyway that are likely to support  
753 future waterbird populations.

754 Balancing specific social, ecological, and economic factors will be necessary to  
755 accurately identify trade-offs affecting wetlands and the resiliency of waterbird migration  
756 networks. This study highlights that waterbird impacts are manifested through complex  
757 interactions between interdependent landscapes that experience independent habitat risks.  
758 Increased pressure on waterbird migration networks will require increased coordination between  
759 important waterbird breeding, wintering, and stopover regions to proactively identify and address  
760 emerging bottlenecks impacting populations as changes to climate and land use accelerate. To

761 inform wetland and waterbird conservation, we make our data available through an interactive  
762 web-based application allowing natural resource managers direct access to long-term wetland  
763 trends used in our analysis (insert link). We encourage using our findings to inform solutions to  
764 wetland loss through collaborative and proactive decision-making among local and regional  
765 stakeholders throughout waterbird flyways of western North America.

766

#### 767 Data Availability Statement

768 The original data presented in the study are publicly available and can be found here:

769 (insert link)

770

#### 771 Author Contributions

772 JPD conceived and designed the study. JPD and JM conducted the wetland and waterbird  
773 analysis. JPD and JM wrote the manuscript. MC and SC contributed to the manuscript. All  
774 authors contributed to the article and approved the submitted version.

775

776

#### 777 Acknowledgments

778 We thank John Vradenburg, senior biologist - Klamath National Wildlife Refuge Complex, and  
779 Michael D'Errico senior biologist - Sacramento Refuge complex for their insight and waterfowl  
780 and shorebird survey data that supported this analysis. We also thank the U.S. Fish and Wildlife  
781 Service for funding that made this work possible. Views in this manuscript from United States  
782 Fish and Wildlife Service authors are their own and do not necessarily represent the agency's  
783 views. Any use of trade, firm, or product names is for descriptive purposes only and does not  
784 imply endorsement by the U.S. Government.

785

#### 786 Supplemental Material

787 See document

788

#### 789 References

790 Amano T, Székely T, Wauchope HS, *et al.* 2020. Responses of global waterbird populations to  
791 climate change vary with latitude. *Nat Clim Chang* **10**: 959–64.

792 American Bird Conservancy. 2015. Top 20 most threatened bird habitats in the U.S. American  
793 Bird Conservancy.

794 Baldassarre GA. 2014. Ducks, Geese, and Swans of North America. JHU Press.

795 Berg JA, Felton MG, Gecy JL, *et al.* 2010. Mosquito control and wetlands. *Wetland Science and*  
796 *Practice* **27**: 24–34.

797 Blevins S, Hansen K, Paige G, and Mac Kinnon A. 2016. Valuing the non-agricultural benefits  
798 of flood irrigation in the Upper Green River

- 799 basin<https://www.wyagresearch.org/research/fdb/2016-offstation-valuing-the-non->  
800 agricultural-benefits-of-flood-irrigation.pdf. Viewed 12 Oct 2021.
- 801 Callaghan CT and Gawlik DE. 2015. Efficacy of eBird data as an aid in conservation planning  
802 and monitoring. *J Field Ornithol* **86**: 298–304.
- 803 Cook BI, Ault TR, and Smerdon JE. 2015. Unprecedented 21st century drought risk in the  
804 American Southwest and Central Plains. *Sci Adv* **1**: e1400082.
- 805 Cowardin LM, Carter FC, and Golet ET. 1979. Classification of wetlands and deepwater habitats  
806 of the United States. Washington, DC, USA: United States Department of the Interior, Fish  
807 and Wildlife Service.
- 808 Dettinger MD, Cayan DR, Diaz HF, and Meko DM. 1998. North–South Precipitation Patterns in  
809 Western North America on Interannual-to-Decadal Timescales. *J Clim* **11**: 3095–111.
- 810 Diffenbaugh NS, Swain DL, and Touma D. 2015. Anthropogenic warming has increased drought  
811 risk in California. *Proc Natl Acad Sci U S A* **112**: 3931–6.
- 812 Donnelly JP, King SL, Knetter J, *et al.* 2021. Migration efficiency sustains connectivity across  
813 agroecological networks supporting sandhill crane migration. *Ecosphere* **12**.
- 814 Donnelly JP, King SL, Silverman NL, *et al.* 2020. Climate and human water use diminish  
815 wetland networks supporting continental waterbird migration. *Glob Chang Biol*.
- 816 Donnelly JP, Naugle DE, Collins DP, *et al.* 2019. Synchronizing conservation to seasonal  
817 wetland hydrology and waterbird migration in semi-arid landscapes. *Ecosphere* **10**: 1–12.
- 818 Doremus H and Tarlock AD. 2003. Fish, farms, and the clash of cultures in the Klamath basin.  
819 *Ecology LQ* **30**: 279.
- 820 Duke EA, Pocewicz A, and Jester S. 2011. Upper Green River Basin Ecosystem Services. The  
821 Nature Conservancy.
- 822 Duncan DC and Devries JH. 2018. Agricultural destruction of Northern Pintail nests on cropland  
823 in prairie Canada. *Avian Conservation & Ecology* **13**.
- 824 Elphick CS and Oring LW. 2003. Conservation implications of flooding rice fields on winter  
825 waterbird communities. *Agric Ecosyst Environ* **94**: 17–29.
- 826 Fasola M and Ruiz X. 1996. The value of rice fields as substitutes for natural wetlands for  
827 waterbirds in the Mediterranean region. *Colonial Waterbirds*: 122–8.
- 828 Feldheim CL, Ackerman JT, Oldenburger SL, *et al.* 2018. California mallards: a review. *Calif*  
829 *Fish Game* **104**: 49–66.
- 830 Fleskes JP, Casazza ML, Overton CT, *et al.* 2018. Changes in the abundance and distribution of  
831 waterfowl wintering in the Central Valley of California, 1973–2000. *Trends and traditions*:

- 832 *Avifaunal change in western North America (WD Shuford, RE Gill Jr, and CM Handel, eds*  
833 *): 50–74.*
- 834 Fleskes JP, Jarvis RL, and Gilmer DS. 2003. Selection of Flooded Agricultural Fields and Other  
835 Landscapes by Female Northern Pintails Wintering in Tulare Basin, California. *Wildl Soc*  
836 *Bull* **31**: 793–803.
- 837 Fleskes JP and Yee JL. 2007. Waterfowl distribution and abundance during spring migration in  
838 southern Oregon and northeastern California. *West N Am Nat* **67**: 409–28.
- 839 Fleskes JP, Yee JL, Yarris GS, *et al.* 2007. Pintail and mallard survival in California relative to  
840 habitat, abundance, and hunting. *J Wildl Manage* **71**: 2238.
- 841 Fleskes JP, Yee JL, Yarris GS, and Loughman DL. 2016. Increased body mass of ducks  
842 wintering in California’s Central Valley. *J Wildl Manage* **80**: 679–90.
- 843 Foti R, Jesus M del, Rinaldo A, and Rodriguez-Iturbe I. 2012. Hydroperiod regime controls the  
844 organization of plant species in wetlands. *Proc Natl Acad Sci U S A* **109**: 19596–600.
- 845 Fox AD, Elmberg J, Tombre IM, and Hessel R. 2017. Agriculture and herbivorous waterfowl: a  
846 review of the scientific basis for improved management. *Biol Rev Camb Philos Soc* **92**:  
847 854–77.
- 848 Gauthier G, Giroux J-F, Reed A, *et al.* 2005. Interactions between land use, habitat use, and  
849 population increase in greater snow geese: what are the consequences for natural wetlands?  
850 *Glob Chang Biol* **11**: 856–68.
- 851 Geisseler D and Horwath WR. 2016. Rice Production in California. University of California  
852 Davis.
- 853 Gibson S. 2019. California Startup to Offer MDF Made from Rice  
854 Straw [https://www.greenbuildingadvisor.com/article/california-startup-to-offer-mdf-made-](https://www.greenbuildingadvisor.com/article/california-startup-to-offer-mdf-made-from-rice-straw)  
855 [from-rice-straw](https://www.greenbuildingadvisor.com/article/california-startup-to-offer-mdf-made-from-rice-straw). Viewed 21 Sep 2021.
- 856 Githeko AK, Lindsay SW, Confalonieri UE, and Patz JA. 2000. Climate change and vector-  
857 borne diseases: a regional analysis. *Bull World Health Organ* **78**: 1136–47.
- 858 Gorelick N, Hancher M, Dixon M, *et al.* 2017. Google Earth Engine: Planetary-scale geospatial  
859 analysis for everyone. *Remote Sens Environ* **202**: 18–27.
- 860 Haig SM, Murphy SP, Matthews JH, *et al.* 2019. Climate-Altered Wetlands Challenge Waterbird  
861 Use and Migratory Connectivity in Arid Landscapes. *Sci Rep* **9**: 4666.
- 862 Herbst DB. 2006. Salinity controls on trophic interactions among invertebrates and algae of solar  
863 evaporation ponds in the Mojave Desert and relation to shorebird foraging and selenium  
864 risk. *Wetlands* **26**: 475–85.
- 865 Hitch AT and Leberg PL. 2007. Breeding distributions of North American bird species moving

- 866 north as a result of climate change. *Conserv Biol* **21**: 534–9.
- 867 Holmes EJ, Saffarinia P, Rypel AL, *et al.* 2021. Reconciling fish and farms: Methods for  
868 managing California rice fields as salmon habitat. *PLoS One* **16**: e0237686.
- 869 Jin, Huiran Huang, Chengquan Lang, Megan W Yeo, In-Young Stehman, Stephen V. 2017.  
870 Monitoring of wetland inundation dynamics in the Delmarva Peninsula using Landsat time-  
871 series imagery from 1985 to 2011. *Remote Sens Environ* **190**: 26–41.
- 872 Johnson WC, Werner B, Guntenspergen GR, *et al.* 2010. Prairie Wetland Complexes as  
873 Landscape Functional Units in a Changing Climate. *Bioscience* **60**: 128–40.
- 874 Jolly ID, McEwan KL, and Holland KL. 2008. A review of groundwater–surface water  
875 interactions in arid/semi-arid wetlands and the consequences of salinity for wetland  
876 ecology. *Ecohydrol* **1**: 43–58.
- 877 Kibler CL, Claire Schmidt E, Roberts DA, *et al.* 2021. A brown wave of riparian woodland  
878 mortality following groundwater declines during the 2012–2019 California drought. *Environ*  
879 *Res Lett*.
- 880 Kirby JS, Stattersfield AJ, Butchart SHM, *et al.* 2008. Key conservation issues for migratory  
881 land- and waterbird species on the world’s major flyways. *Bird Conserv Int* **18**: S49–73.
- 882 Kohl JD, Casazza ML, Overton CT, *et al.* Investigating postbreeding movements and molting  
883 ecology of gadwall and mallards in California. *Journal of Wildlife Management*.
- 884 Lee S-Y, Ryan ME, Hamlet AF, *et al.* 2015. Projecting the Hydrologic Impacts of Climate  
885 Change on Montane Wetlands. *PLoS One* **10**: e0142960.
- 886 Lehikoinen A, Jaatinen K, Vähätalo AV, *et al.* 2013. Rapid climate driven shifts in wintering  
887 distributions of three common waterbird species. *Glob Chang Biol* **19**: 2071–81.
- 888 Li R, Ou G, Pun M, and Larson L. 2018. Evaluation of groundwater resources in response to  
889 agricultural management scenarios in the Central Valley, California. *J water resour plan*  
890 *manag* **144**: 04018078.
- 891 Mann ME and Gleick PH. 2015. Climate change and California drought in the 21st century. *Proc*  
892 *Natl Acad Sci U S A* **112**: 3858–9.
- 893 McMenamin SK, Hadly EA, and Wright CK. 2008. Climatic change and wetland desiccation  
894 cause amphibian decline in Yellowstone National Park. *Proc Natl Acad Sci U S A* **105**:  
895 16988–93.
- 896 Medellín-Azuara J, MacEwan D, Howitt RE, *et al.* 2015. Hydro-economic analysis of  
897 groundwater pumping for irrigated agriculture in California’s Central Valley, USA.  
898 *Hydrogeol J* **23**: 1205–16.
- 899 Moore JN. 2016. Recent desiccation of western Great Basin saline lakes: Lessons from Lake

- 900 Abert, Oregon, U.s.a. *Sci Total Environ* **554-555**: 142–54.
- 901 [NASS] USDA National Agricultural Statistics Service. 2019. USDA National Agricultural  
902 Statistics Service Cropland Data Layer.
- 903 Pavón-Jordán D, Fox AD, Clausen P, *et al.* 2015. Climate-driven changes in winter abundance of  
904 a migratory waterbird in relation to EU protected areas. *Divers Distrib* **21**: 571–82.
- 905 Petrie MJ, Fleskes JP, Wolder MA, *et al.* 2016. Potential effects of drought on carrying capacity  
906 for wintering waterfowl in the central valley of California. *Journal of Fish and Wildlife*  
907 *Management* **7**: 408+.
- 908 Petrie M, Vest J, and Smith D. 2013. Chapter Four: Waterfowl, Intermountain West Joint  
909 Venture 2013 Implementation Plan. Missoula, Montana, USA: Intermountain West Joint  
910 Venture.
- 911 Podruzny KM, Devries JH, Armstrong LM, and Rotella JJ. 2002. Long-Term Response of  
912 Northern Pintails to Changes in Wetlands and Agriculture in the Canadian Prairie Pothole  
913 Region. *J Wildl Manage* **66**: 993–1010.
- 914 QGIS Development Team. 2020. QGIS. Open Source Geospatial Foundation Project.
- 915 Rajagopalan B and Lall U. 1998. Interannual variability in western US precipitation. *J Hydrol*  
916 **210**: 51–67.
- 917 R Core Team. 2019. R: A Language and Environment for Statistical Computing. Vienna,  
918 Austria: R Foundation for Statistical Computing.
- 919 Reiter ME, Elliott N, Veloz S, *et al.* 2015. Spatio-temporal patterns of open surface water in the  
920 Central Valley of California 2000-2011: Drought, land cover, and waterbirds. *J Am Water*  
921 *Resour Assoc* **51**: 1722–38.
- 922 Reynolds MD, Sullivan BL, Hallstein E, *et al.* 2017. Dynamic conservation for migratory  
923 species. *Sci Adv* **3**: e1700707.
- 924 Richter BD, Brown JD, DiBenedetto R, *et al.* 2017. Opportunities for saving and reallocating  
925 agricultural water to alleviate water scarcity. *Water Policy* **19**: 886–907.
- 926 Rosen RA, Yolles P, Powelson M, *et al.* 2009. Undelivered Water: Fulfilling the CVIA Promise  
927 to the Central Valley.
- 928 RStudio Team. 2019. RStudio: Integrated Development Environment for R.
- 929 Sabalow R. 2020. Disease is decimating California’s wild ducks and shorebirds. What’s really  
930 responsible <https://www.sacbee.com/news/california/article247818070.html>. Viewed 12 Sep  
931 2021.
- 932 Schmaljohann H and Both C. 2017. The limits of modifying migration speed to adjust to climate

- 933 change. *Nat Clim Chang* **7**: 573.
- 934 Senner SE, Andres BA, and Gates HR. 2016. Pacific Americas shorebird conservation strategy.  
935 National Audubon Society.
- 936 Senner NR, Moore JN, Seager ST, *et al.* 2018. A salt lake under stress: Relationships among  
937 birds, water levels, and invertebrates at a Great Basin saline lake. *Biol Conserv* **220**: 320–9.
- 938 Shuford WD, Humphrey JM, Hansen RB, *et al.* 2007. Summer distribution, abundance, and  
939 habitat use of Blacknecked Stilts and American Avocets in California’s Central Valley.  
940 *Western Birds* **38**: 11–28.
- 941 Shuford WD, Page GW, and Kjelson JE. 1998. Patterns and dynamics of shorebird use of  
942 California’s Central Valley. *Condor* **100**: 227–44.
- 943 Siegel S. 1957. Nonparametric Statistics. *Am Stat* **11**: 13–9.
- 944 Simon Wang S-Y, Lin Y-H, Gillies RR, and Hakala K. 2016. Indications for protracted  
945 groundwater depletion after drought over the Central Valley of California. *J Hydrometeorol*  
946 **17**: 947–55.
- 947 Smith LM, Pederson RL, and Kaminski RM. 1989. Habitat Management for Migrating and  
948 Wintering Waterfowl in North America. Texas Tech University Press.
- 949 Snyder KA, Evers L, Chambers JC, *et al.* 2019. Effects of Changing Climate on the Hydrological  
950 Cycle in Cold Desert Ecosystems of the Great Basin and Columbia Plateau. *Rangeland Ecol*  
951 *Manage* **72**: 1–12.
- 952 Spooner FEB, Pearson RG, and Freeman R. 2018. Rapid warming is associated with population  
953 decline among terrestrial birds and mammals globally. *Glob Chang Biol* **24**: 4521–31.
- 954 Strimas-Mackey M, Miller E, and Hochachka W. 2018. auk: eBird Data Extraction and  
955 Processing with AWK. *R package version 0 3 3*.
- 956 Strum KM, Reiter ME, Hartman CA, *et al.* 2013. Winter management of California’s rice fields  
957 to maximize waterbird habitat and minimize water use. *Agric Ecosyst Environ* **179**: 116–24.
- 958 Sullivan BL, Wood CL, Iliff MJ, *et al.* 2009. eBird: A citizen-based bird observation network in  
959 the biological sciences. *Biol Conserv* **142**: 2282–92.
- 960 Swain DL. 2021. A shorter, sharper rainy season amplifies California wildfire risk. *Geophys Res*  
961 *Lett* **48**.
- 962 Taft OW and Haig SM. 2005. The value of agricultural wetlands as invertebrate resources for  
963 wintering shorebirds. *Agric Ecosyst Environ* **110**: 249–56.
- 964 Thomas JM. 1995. Water budget and salinity of Walker Lake, western Nevada. US Geological  
965 Survey,.



- 966 Thomas BF, Famiglietti JS, Landerer FW, *et al.* 2017. GRACE Groundwater Drought Index:  
967 Evaluation of California Central Valley groundwater drought. *Remote Sens Environ* **198**:  
968 384–92.
- 969 Thorvaldson J and Pritchett JG. 2006. Economic impact analysis of reduced irrigated acreage in  
970 four river basins in Colorado. Colorado Water Resources Research Institute.
- 971 UNESCO-UN-Water. 2020. United Nations World Water Development Report 2020:Water and  
972 Climate Change,. Paris, France: United Nations.
- 973 University California Davis. 2018. Rice Production Manual. California Rice Research Board.
- 974 U.S. Census Bureau. 2021. U.S. Census Bureau <https://www.census.gov/en.html>. Viewed 7 Nov  
975 2021.
- 976 USFWS. 2020. Central Valley Joint Venture Implementation Plan. U.S. Fish and Wildlife  
977 Service.
- 978 USGS. 2020. California’s Central Valley [https://ca.water.usgs.gov/projects/central-valley/about-](https://ca.water.usgs.gov/projects/central-valley/about-central-valley.html)  
979 [central-valley.html](https://ca.water.usgs.gov/projects/central-valley/about-central-valley.html). Viewed 12 Jul 2021.
- 980 Visser ME, Perdeck AC, BALEN JH van, and Both C. 2009. Climate change leads to decreasing  
981 bird migration distances. *Glob Chang Biol* **15**: 1859–65.
- 982 Walker J and Taylor PD. 2017. Using eBird data to model population change of migratory bird  
983 species. *Avian Conserv Ecol/Ecol Conserv Oiseaux* **12**.
- 984 Welsh LW and Endter-Wada J. 2017. Piping water from rural counties to fuel growth in Las  
985 Vegas, Nevada: Water transfer risks in the arid USA West. *Water Alternatives* **10**: 420.
- 986 Wetlands International. 2012. Waterbird Population Estimates, Fifth Edition. Wageningen,  
987 Netherlands: Wetlands International.
- 988 Wickham H, Averick M, Bryan J, *et al.* 2019. Welcome to the tidyverse. *J Open Source Softw* **4**:  
989 1686.
- 990 Wiken E, Jiménez Nava F, and Griffith G. 2011. North American Terrestrial Ecoregions—Level  
991 III. Montreal, Canada: Commission for Environmental Cooperation.
- 992 Yarris GS, McLandress MR, and Alison E. H. Perkins. 1994. Molt Migration of Postbreeding  
993 Female Mallards from Suisun Marsh, California. *Condor* **96**: 36–45.
- 994 Zurell D, Graham CH, Gallien L, *et al.* 2018. Long-distance migratory birds threatened by  
995 multiple independent risks from global change. *Nat Clim Chang* **8**: 992–6.
- 996
- 997

998

999

1000

1001

1002

1003

1004
